# Supplementary material for: Asymmetric [3 + 2] annulations catalyzed by a planar-chiral derivative of DMAP
Source: Royal Society of Chemistry journal article supplement (doi:10.1039/b603172b), 2006-01-01
Supplement: b603172b.pdf [file b603172b.pdf]

# Asymmetric [3+2] Annulations Catalyzed by a Planar-Chiral Derivative of DMAP

Erhard Bappert, Peter Mueller, and Gregory C. Fu\*

Department of Chemistry, Massachusetts Institute of Technology,  
Cambridge, Massachusetts 02139

## SUPPORTING INFORMATION

### I. General

**General.** Anhydrous solvents were obtained by passage through drying columns of a GlassContour system (Irvine, CA). Melting points were measured on a Hoover melting point apparatus using open glass capillaries; the values are uncorrected. Infrared spectra were recorded as thin films on a Perkin Elmer Spectrum 2000 FTIR spectrophotometer.

**Materials.** Cinnamic acid, 3-fluorocinnamic acid, 2-methylcinnamic acid, 4-bromocinnamic acid, and 3-furan-3-ylacrylic acid were purchased from the Aldrich Chemical Company. 3,5-Dimethoxycinnamic acid was purchased from Acros Organics, 3-naphthalen-1-ylacrylic acid was purchased from Avocado, and 3-furan-2-ylacrylic acid was purchased from Alfa Aesar. DAST [(diethylamino)sulfur trifluoride] and deoxofluor [bis(2-methoxyethyl)aminosulfur trifluoride] were purchased from the Aldrich Chemical Company. The silylated 1,3-dimethylindene was prepared based on a previously reported procedure.<sup>1</sup> Cinnamic anhydride was prepared according to a literature procedure.<sup>2</sup>

## II. Synthesis of Acid Fluorides

**General Procedure.** A Schlenk tube was charged with the acrylic acid and placed under an argon atmosphere. Dry  $\text{CH}_2\text{Cl}_2$  (10-20 mL) was added, and the solution was cooled to 0 °C. DAST or deoxofluor (1.05-1.10 equivalents) was added in one portion by syringe. The solution was allowed to warm to room temperature overnight, and then the solvent was removed under vacuum. The residue was dissolved in the minimum amount of solvent (5-20%  $\text{Et}_2\text{O}$ /pentane), and a small amount of silica gel (~100 mg) was added. The solution was quickly passed through a short (10-15 cm) column of silica gel (5-20%  $\text{Et}_2\text{O}$ /pentane), and the solvent was removed under vacuum.<sup>3</sup> Caution: We recommend that a rotary evaporator NOT be used for this procedure, since some of the acid fluorides are very volatile.

The yields have not been optimized

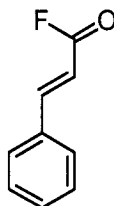

**[351-59-7]** This compound was prepared according to the General Procedure using cinnamic acid (4.00 g, 27.0 mmol) and DAST (3.72 mL, 4.56 g, 28.4 mmol) in  $\text{CH}_2\text{Cl}_2$  (40 mL). The product was obtained as a clear, colorless oil which solidified in the freezer (2.28 g, 56%).

Mp 30 °C;

$^1\text{H}$  NMR (400 MHz,  $\text{CDCl}_3$ )  $\delta$  7.78 (d,  $J = 16.0$  Hz, 1H), 7.52-7.59 (m, 2H), 7.43-7.51 (m, 3H), 6.39 (dd,  $J = 16.0$  Hz,  $J = 7.4$  Hz, 1H);

$^{13}\text{C}$  NMR (125 MHz,  $\text{CDCl}_3$ )  $\delta$  157.4 (d,  $J = 338$  Hz), 151.7 (d,  $J = 5.8$  Hz), 133.4, 132.1, 129.4, 129.0, 112.3 (d,  $J = 66.8$  Hz);

$^{19}\text{F}$  NMR (282 MHz,  $\text{CDCl}_3$ )  $\delta$  -135.9 (s);

GCMS: calcd for  $\text{C}_9\text{H}_7\text{F}_1\text{O}_1$ : 150; found:  $m/z$ : 150 [ $\text{M}^+$ ].

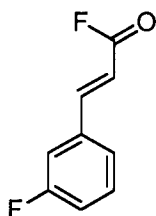

This compound was prepared according to the General Procedure using 3-fluorocinnamic acid (558 mg, 3.63 mmol) and DAST (0.53 mL, 0.64 g, 4.0 mmol) in  $\text{CH}_2\text{Cl}_2$  (10 mL). The product was obtained as a clear, colorless oil (239 mg, 39%).

$^1\text{H}$  NMR (400 MHz,  $\text{CDCl}_3$ )  $\delta$  7.82 (d,  $J = 15.9$  Hz, 1H), 7.45 (ddd,  $J = 8.0$  Hz,  $J = 7.9$  Hz,  $J = 5.6$  Hz, 1H), 7.37 (d (br),  $J = 7.7$ , 1H), 7.27-7.31 (m, 1H), 7.20 (tdd,  $J = 8.3$  Hz,  $J = 2.5$  Hz,  $J = 1.0$  Hz, 1H), 6.39 (dd,  $J = 16.0$  Hz,  $J = 7.2$  Hz, 1H);

$^{13}\text{C}$  NMR (100 MHz,  $\text{CDCl}_3$ )  $\delta$  163.2 (d,  $J = 248$  Hz), 156.9 (d,  $J = 339$  Hz), 150.0, 135 (d,  $J = 7.8$  Hz), 131.1 (d,  $J = 8.0$  Hz), 124.9 (d,  $J = 3.0$  Hz), 119.0 (d,  $J = 21.3$  Hz), 115.1 (d,  $J = 22.1$  Hz), 113.8 (d,  $J = 67.6$  Hz);

$^{19}\text{F}$  NMR (282 MHz,  $\text{CDCl}_3$ )  $\delta$  -112.3 to -112.2 (m), -135.3 (s);

GCMS: calcd for  $\text{C}_9\text{H}_6\text{F}_2\text{O}_1$ : 168; found: m/z: 168 [ $\text{M}^+$ ].

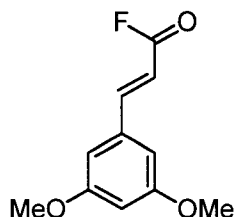

This compound was prepared according to the General Procedure using 3,5-dimethoxycinnamic acid (545 mg, 2.62 mmol) and DAST (0.38 mL, 0.46 g, 2.88 mmol) in  $\text{CH}_2\text{Cl}_2$  (20 mL). The product was obtained as thin yellow needles (390 mg, 71%).

Mp 101-103  $^\circ\text{C}$ ;

$^1\text{H}$  NMR (400 MHz,  $\text{CDCl}_3$ )  $\delta$  7.75 (d,  $J = 15.9$  Hz, 1H), 6.69 (d,  $J = 2.2$  Hz, 2H), 6.57 (t,  $J = 2.2$  Hz, 1H), 6.34 (dd,  $J = 15.9$  Hz,  $J = 7.5$  Hz, 1H), 3.83 (s, 6H);

$^{13}\text{C}$  NMR (125 MHz,  $\text{CDCl}_3$ )  $\delta$  161.4, 157.3 (d,  $J = 338$  Hz), 151.7, 135.1, 112.8 (d,  $J = 66.8$  Hz), 106.8, 104.2, 55.8;

$^{19}\text{F}$  NMR (282 MHz,  $\text{CDCl}_3$ )  $\delta$  -135.8 (s);

GCMS: calcd for  $\text{C}_{11}\text{H}_{11}\text{F}_1\text{O}_3$ : 210; found: m/z: 210 [ $\text{M}^+$ ].

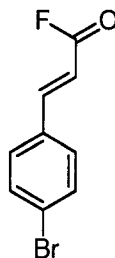

This compound was prepared according to the General Procedure using 4-bromocinnamic acid (1.00 g, 4.40 mmol) and DAST (0.61 mL, 0.74 g, 4.63 mmol) in  $\text{CH}_2\text{Cl}_2$  (10 mL). The product was obtained as yellow needles (582 mg, 58%).

Mp 112-113  $^\circ\text{C}$ ;

$^1\text{H}$  NMR (400 MHz,  $\text{CDCl}_3$ )  $\delta$  7.78 (d,  $J = 16.0$  Hz, 1H), 7.59 (dt,  $J = 8.8$  Hz,  $J = 2.4$  Hz, 2H), 7.39 (dt,  $J = 8.4$  Hz,  $J = 2.4$  Hz, 2H), 6.37 (dd,  $J = 16.0$  Hz,  $J = 7.2$  Hz, 1H);

$^{13}\text{C}$  NMR (100 MHz,  $\text{CDCl}_3$ )  $\delta$  157.0 (d,  $J = 339$  Hz), 150.2 (d,  $J = 6.0$  Hz), 132.7, 132.2, 130.2, 126.7, 113.0 (d,  $J = 67.7$  Hz);

$^{19}\text{F}$  NMR (282 MHz,  $\text{CDCl}_3$ )  $\delta$  -135.5 (s);

GCMS: calcd for C<sub>9</sub>H<sub>6</sub>BrF<sub>1</sub>O<sub>1</sub>: 230/228; found: m/z: 230 [M<sup>+</sup>], 228 [M<sup>+</sup>].

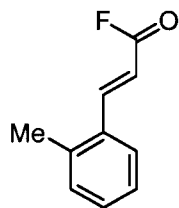

This compound was prepared according to the General Procedure using 2-methylcinnamic acid (839 mg, 5.18 mmol) and DAST (0.72 mL, 0.88 g, 5.44 mmol) in CH<sub>2</sub>Cl<sub>2</sub> (15 mL). The product was obtained as a clear, colorless oil (672 mg, 79%).

<sup>1</sup>H NMR (400 MHz, CDCl<sub>3</sub>) δ 8.18 (d, *J* = 15.9 Hz, 1H), 7.61 (dd, *J* = 9.2 Hz, *J* = 1.5 Hz, 1H), 7.39 (td, *J* = 7.6 Hz, *J* = 1.3 Hz, 1H), 7.26-7.30 (m, 2H), 6.33 (dd, *J* = 15.9 Hz, *J* = 6.9 Hz, 1H), 2.49 (s, 3H);

<sup>13</sup>C NMR (100 MHz, CDCl<sub>3</sub>) δ 157.4 (d, *J* = 339 Hz), 149.1 (d, *J* = 6.6 Hz), 138.7, 132.2, 131.8, 131.3, 127.0, 126.8, 113.0 (d, *J* = 66.8 Hz), 19.9;

<sup>19</sup>F NMR (282 MHz, CDCl<sub>3</sub>) δ -135.7 (s);

GCMS: calcd for C<sub>10</sub>H<sub>9</sub>F<sub>1</sub>O<sub>1</sub>: 164; found: m/z: 164 [M<sup>+</sup>].

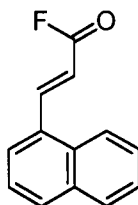

This compound was prepared according to the General Procedure using 3-naphthalen-1-ylacrylic acid (1.00 g, 5.05 mmol) and DAST (0.74 mL, 0.90 g, 5.56 mmol) in CH<sub>2</sub>Cl<sub>2</sub> (10 mL). The product was obtained as yellow needles (0.86 g, 85%).

Mp 55-56 °C;

<sup>1</sup>H NMR (400 MHz, CDCl<sub>3</sub>) δ 8.70 (d, *J* = 15.8 Hz, 1H), 8.16 (d, *J* = 8.4 Hz, 1H), 7.99 (d, *J* = 8.2 Hz, 1H), 7.92 (dd, *J* = 8.3 Hz, *J* = 1.0 Hz, 1H), 7.82 (d, *J* = 7.22 Hz, 1H), 7.25-7.66 (m, 3H), 6.49 (dd, *J* = 15.7 Hz, *J* = 7.1 Hz, 1H);

<sup>13</sup>C NMR (100 MHz, CDCl<sub>3</sub>) δ 157.2 (d, *J* = 339 Hz), 148.4 (d, *J* = 6.4 Hz), 133.9, 132.4, 131.5, 130.4, 129.2, 127.7, 126.8, 126.1, 125.6, 123.0, 114.5 (d, *J* = 66.9 Hz);

<sup>19</sup>F NMR (282 MHz, CDCl<sub>3</sub>) δ -135.7 (s);

GCMS: calcd for C<sub>13</sub>H<sub>9</sub>F<sub>1</sub>O<sub>1</sub>: 200; found: m/z: 200 [M<sup>+</sup>].

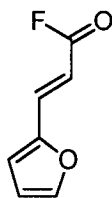

This compound was prepared according to the General Procedure using 3-furan-2-ylacrylic acid (1.00 g, 7.25 mmol) and DAST (1.01 mL, 1.23 g, 7.60 mmol) in CH<sub>2</sub>Cl<sub>2</sub> (10 mL). The product was obtained as colorless needles (0.66 g, 65%).

Mp 44-45 °C;

<sup>1</sup>H NMR (400 MHz, CDCl<sub>3</sub>) δ 7.59 (d, *J* = 0.6 Hz, 1H), 7.55 (d, *J* = 15.6 Hz, 1H), 6.80 (d, *J* = 3.5 Hz, 1H), 6.55 (dd, *J* = 3.5 Hz, *J* = 1.8 Hz, 1H), 6.23 (dd, *J* = 15.6 Hz, *J* = 8.1 Hz, 1H);

<sup>13</sup>C NMR (100 MHz, CDCl<sub>3</sub>) δ 157.5 (d, *J* = 336 Hz), 150.1, 146.7, 136.8 (d, *J* = 6.3 Hz), 118.3, 113.2, 109.4 (d, *J* = 68.8 Hz);

<sup>19</sup>F NMR (282 MHz, CDCl<sub>3</sub>) δ -137.5 (s);

GCMS: calcd for C<sub>7</sub>H<sub>5</sub>F<sub>1</sub>O<sub>2</sub>: 140; found: *m/z*: 140 [M<sup>+</sup>].

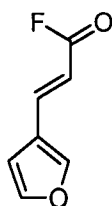

This compound was prepared according to the General Procedure using 3-furan-3-ylacrylic acid (1.00 g, 7.25 mmol) and deoxofluor (1.40 mL, 1.68 g, 7.60 mmol) in CH<sub>2</sub>Cl<sub>2</sub> (10 mL). The product was obtained as yellow needles (0.67 g, 66%).

Mp 59-60 °C;

<sup>1</sup>H NMR (400 MHz, CDCl<sub>3</sub>) δ 7.72-7.77 (m, 2H), 7.49-7.51 (m, 1H), 6.64 (d, *J* = 2.0 Hz, 1H), 6.08 (dd, *J* = 16.0 Hz, *J* = 7.8 Hz, 1H);

<sup>13</sup>C NMR (100 MHz, CDCl<sub>3</sub>) δ 157.3 (d, *J* = 337 Hz), 146.5, 145.3, 141.6 (d, *J* = 6.3 Hz), 122.3, 111.9 (d, *J* = 67.6 Hz), 107.4;

<sup>19</sup>F NMR (282 MHz, CDCl<sub>3</sub>) δ -137.4 (s);

GCMS: calcd for C<sub>7</sub>H<sub>5</sub>F<sub>1</sub>O<sub>2</sub>: 140; found: *m/z*: 140 [M<sup>+</sup>].

### III. Synthesis of Indenes

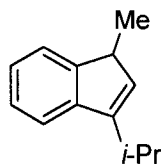

A Schlenk flask was charged with magnesium turnings (1.24 g, 51.0 mmol) and placed under an argon atmosphere. Dry Et<sub>2</sub>O (30 mL) was added, and the solution was treated with *i*-propyl bromide (4.88 mL, 6.40 g, 51.6 mmol). After 1 h, almost all of the magnesium had been consumed, and the yellow solution was transferred to another Schlenk flask via cannula. 3-Methyl-indan-1-one (1.96 g, 13.4 mmol) was added slowly, and the yellow reaction mixture was allowed to stir for two days at room temperature. A saturated solution of NH<sub>4</sub>Cl (50 mL) was added, followed by 1 M HCl (20 mL), in order to dissolve all of the salts. The mixture was extracted with pentane (2 x 200 mL). The organic layer was passed through a short plug of silica gel (Et<sub>2</sub>O) and concentrated. The oily residue was dissolved in MeOH (100 mL), and 1 M HCl (10 mL) was added. The solution was allowed to stir overnight. Water (300 mL) was added, and the mixture was extracted with pentane (2 x 200 mL). The organic layer was dried over MgSO<sub>4</sub>, filtered through a short plug of silica gel, and concentrated. The product was obtained as a clear, colorless oil (1.20 g, 52%).

<sup>1</sup>H NMR (400 MHz, CDCl<sub>3</sub>) (contains 7% of the isomer formed by dehydration via loss of the methine proton of the *i*-Pr group) δ 7.42 (dd, *J* = 7.6 Hz, *J* = 0.4 Hz, 1H), 7.38 (d, *J* = 7.2 Hz, 1H), 7.30 (td, *J* = 7.6 Hz, *J* = 0.8 Hz, 1H), 7.22 (td, *J* = 7.2 Hz, *J* = 0.8 Hz, 1H), 6.14 (s, 1H), 3.43 (q, *J* = 7.6 Hz, 1H), 2.92 (sept (br), *J* = 7.2 Hz, 1H), 1.28-1.32 (m, 9H);

<sup>13</sup>C NMR (100 MHz, CDCl<sub>3</sub>) δ 150.5, 149.4, 132.8, 126.3, 124.8, 122.8, 119.6, 43.6, 27.0, 22.1 (2), 16.6;

IR (film) *v* 3649, 3629, 2961, 1653, 1635, 1559, 1540, 1457, 769, 746, 668 cm<sup>-1</sup>;

GCMS: major isomer: calcd for C<sub>13</sub>H<sub>16</sub>: 172; found: *m/z*: 172 [M<sup>+</sup>]; minor isomer: calcd for C<sub>13</sub>H<sub>16</sub>: 172; found: *m/z*: 172 [M<sup>+</sup>].

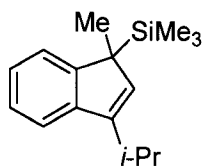

A Schlenk flask was charged with the indene prepared above (480 mg, 2.79 mmol) and placed under an argon atmosphere. Dry pentane (40 mL) was added, and the solution was treated with TMEDA (0.46 mL, 3.07 mmol) and *n*-butyllithium (1.92 mL, 3.07 mmol; 1.6 M in hexanes). The solution was stirred at room temperature overnight. A grainy yellow precipitate formed in the orange solution. The Schlenk flask was transferred into a glove box, and the solution was decanted. The precipitate was

dissolved in dry THF (10 mL), and Me<sub>3</sub>SiCl (0.39 mL, 3.07 mmol) was added. After 10 minutes, the reaction mixture was concentrated to dryness. Column chromatography on silica gel (pentane) afforded the product as a clear, colorless oil (255 mg, 38%).

<sup>1</sup>H NMR (400 MHz, CDCl<sub>3</sub>) (contains 5% of the isomer with the TMS group adjacent to the *i*-Pr group) δ 7.46 (d, *J* = 7.4 Hz, 1H), 7.38 (d, *J* = 7.5 Hz, 1H), 7.28 (td, *J* = 7.4 Hz, *J* = 1.2 Hz, 1H), 7.22 (td, *J* = 7.4 Hz, *J* = 1.2 Hz, 1H), 6.20 (d, *J* = 0.9 Hz, 1H), 3.04 (septd, *J* = 6.8 Hz, *J* = 1.1 Hz, 1H), 1.35 (d, *J* = 6.8 Hz, 3H), 1.32 (d, *J* = 6.9 Hz, 3H), 1.49 (s, 3H), -0.11 (s, 9H);

<sup>13</sup>C NMR (100 MHz, CDCl<sub>3</sub>) δ 151.6, 147.4, 143.6, 134.4, 124.8, 123.8, 122.1, 119.6, 46.0, 27.1, 23.0, 22.2, 16.3, -3.3;

IR (film) *v* 3064, 2958, 2867, 1456, 1381, 1248, 1078, 1020, 936, 838, 749, 668 cm<sup>-1</sup>;

GCMS: calcd for C<sub>16</sub>H<sub>24</sub>Si<sub>1</sub>: 244; found: *m/z*: 244 [M<sup>+</sup>].

#### IV. Catalytic Asymmetric [3+2] Annulations

**General Procedure.** Catalyst **2** (9.2 mg/vial; total: 18.4 mg, 0.050 mmol, 10 mol%) was weighed into two 1.5-mL vials in a glove box. One batch of the catalyst was dissolved in anhydrous CH<sub>2</sub>Cl<sub>2</sub> (2.0 mL) and added to the acid fluoride (0.50 mmol, 1.0 equiv) in a dry 25-mL vial. CH<sub>2</sub>Cl<sub>2</sub> (0.5 mL) was used to rinse the vial that contained the catalyst, and this solution was also added to the 25-mL vial. A solution of the silylated indene (0.650 mmol, 1.3 equiv) in anhydrous CH<sub>2</sub>Cl<sub>2</sub> (2.0 mL) was added in one portion to the vial that contained the catalyst and the acid fluoride. CH<sub>2</sub>Cl<sub>2</sub> (0.5 mL) was used to rinse the vial that contained the silylated indene, and this solution was added to the reaction vessel. The reaction vessel was capped with a septum cap and stirred for 7 h at ~40 °C. Then, the second batch of catalyst was added as a solution in CH<sub>2</sub>Cl<sub>2</sub> (0.2 mL). The reaction mixture was stirred for an additional 15 h at ~40 °C, then it was passed through a short plug of silica gel (Et<sub>2</sub>O) and concentrated. The diastereomeric ratio of the unpurified mixture was determined <sup>1</sup>H NMR analysis. The desired product was then purified by column chromatography on silica gel using 5-20% Et<sub>2</sub>O/pentane as the eluent.

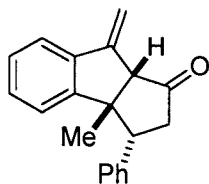

**Eq 1. (3R,3aR,8aS)-3a-Methyl-8-methylene-3-phenyl-3,3a,8,8a-tetrahydro-2H-cyclopenta[a]inden-1-one.** Isolated as white needles: run 1: 79.5 mg (58%; 77% ee, 93:7 dr); run 2: 84.0 mg (61%; 78% ee, 92:8 dr).

Mp 108-109 °C;

<sup>1</sup>H NMR (400 MHz, CDCl<sub>3</sub>) δ 7.45 (d, *J* = 7.7 Hz, 1H), 7.33-7.35 (m, 3H), 7.19 (t, *J* = 7.4 Hz, 1H), 7.12 (d (br), *J* = 3.2 Hz, 2H), 6.94 (t, *J* = 7.5 Hz, 1H), 5.89 (d, *J* = 7.8 Hz, 1H), 5.60 (d, *J* = 1.6 Hz, 1H), 5.38 (d, *J* = 1.4 Hz, 1H), 3.61 (dd, *J* = 14.5 Hz, *J* = 6.4 Hz, 1H), 3.30 (d, *J* = 1.3 Hz, 1H), 2.68 (dd, *J* = 16.5 Hz, *J* = 14.6 Hz, 1H), 2.49 (ddd, *J* = 16.6 Hz, *J* = 6.4 Hz, *J* = 1.4 Hz, 1H), 1.57 (s, 3H);

<sup>13</sup>C NMR (100 MHz, CDCl<sub>3</sub>) δ 214.1, 147.6, 145.6, 140.2, 137.6, 129.1, 128.2, 128.2, 127.8, 127.6, 127.0, 120.6, 106.3, 66.4, 55.3, 51.8, 42.8, 28.1;

IR (film) *v* 3467, 3030, 2958, 2924, 2867, 1745 (C=O), 1638, 1497, 1453, 1185, 881, 768, 702 cm<sup>-1</sup>;

LCMS (ES<sup>+</sup>): calcd for C<sub>20</sub>H<sub>18</sub>O<sub>1</sub> [M<sup>+</sup>]: 274; found [M+H<sup>+</sup>]: 275.

The enantiomeric excess was determined by chiral HPLC analysis: Chiralpak IA, 10.0% CH<sub>2</sub>Cl<sub>2</sub>:hexanes, 1.0 mL/min, (3S,3aS,8aR): *t*<sub>r</sub>: 13.8 min; (3R,3aR,8aS): *t*<sub>r</sub>: 17.1 min.

(3R,3aR,8aS): Using catalyst (-)-**2**, [α]<sub>D</sub><sup>22</sup> +38° (*c* = 0.50, CHCl<sub>3</sub>).



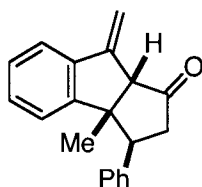

**3a-Methyl-8-methylene-3-phenyl-3,3a,8,8a-tetrahydro-2H-cyclopenta[*a*]inden-1-one.** Isolated as a resinous solid.

$^1\text{H}$  NMR (400 MHz,  $\text{CDCl}_3$ )  $\delta$  7.52-7.54 (m, 1H), 7.28-7.40 (m, 5H), 7.15-7.21 (m, 3H), 5.67 (d,  $J = 2.3$  Hz, 1H), 5.47 (d,  $J = 2.1$  Hz, 1H), 3.51 (t,  $J = 7.6$  Hz, 1H), 3.37 (d,  $J = 1.8$  Hz, 1H), 2.82 (ddd,  $J = 17.9$  Hz,  $J = 7.3$  Hz,  $J = 1.7$  Hz, 1H), 2.66 (dd,  $J = 17.9$  Hz,  $J = 8.0$  Hz, 1H), 1.11 (s, 3H);

$^{13}\text{C}$  NMR (100 MHz,  $\text{CDCl}_3$ )  $\delta$  216.2, 152.3, 144.9, 140.4, 138.7, 129.3, 128.6, 128.4, 128.0, 127.3, 123.6, 121.3, 106.8, 65.2, 55.6, 50.9, 45.3, 23.0;

IR (film)  $\nu$  3061, 2973, 2929, 2863, 1726, 1683 (C=O), 1609, 1576, 1449, 1057, 1031, 752  $\text{cm}^{-1}$ ;

LCMS ( $\text{ES}^+$ ): calcd for  $\text{C}_{20}\text{H}_{18}\text{O}_1$  [ $\text{M}^+$ ]: 274; found [ $\text{M}+\text{H}^+$ ]: 275.

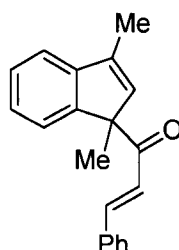

**1-(1,3-Dimethyl-1H-inden-1-yl)-3-phenyl-propenone.** Isolated as a resinous solid: run 1: 25.1 mg (18%; 11% ee); run 2: 24.2 mg (18%; 14% ee).

$^1\text{H}$  NMR (400 MHz,  $\text{CDCl}_3$ )  $\delta$  7.63 (d,  $J = 15.7$  Hz, 1H), 7.41-7.45 (m, 2H), 7.26-7.32 (m, 7H), 6.09 (d,  $J = 1.4$  Hz, 1H), 6.04 (d,  $J = 15.7$  Hz, 1H), 2.30 (d,  $J = 1.5$  Hz, 3H), 1.56 (s, 3H);

$^{13}\text{C}$  NMR (100 MHz,  $\text{CDCl}_3$ )  $\delta$  197.9, 147.7, 146.3, 143.2, 141.8, 135.0, 134.9, 130.2, 128.9, 128.4, 127.9, 126.6, 123.1, 121.9, 119.9, 64.5, 17.9, 13.4;

IR (film)  $\nu$  3030, 2960, 2924, 1740 (C=O), 1497, 1462, 1453, 1408, 1204, 1157, 886, 765, 701  $\text{cm}^{-1}$ ;

LCMS ( $\text{ES}^+$ ): calcd for  $\text{C}_{20}\text{H}_{18}\text{O}_1$  [ $\text{M}^+$ ] 274; found [ $\text{M}+\text{H}^+$ ] 275.

The enantiomeric excess was determined by chiral HPLC analysis: Chiralpak AD-H, 1.0% *i*-PrOH:hexanes, 1.0 mL/min,  $t_r$ : 13.3 min;  $t_r$ : 25.6 min.

Using catalyst (-)-**2**,  $[\alpha]_D^{22} -9.2^\circ$  ( $c = 0.50$ ,  $\text{CHCl}_3$ ).

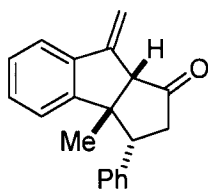

**Eq 2 (cinnamic anhydride).** **(3R,3aR,8aS)-3a-Methyl-8-methylene-3-phenyl-3,3a,8,8a-tetrahydro-2H-cyclopenta[a]inden-1-one.** The General Procedure was followed, except that cinnamic anhydride (139 mg, 0.50 mmol) was used instead of an acid fluoride.

Isolated as white needles: run 1: 37.6 mg (29%; 77% ee, 89:11 dr); run 2: 43.3 mg (32%; 79% ee, 90:10 dr).

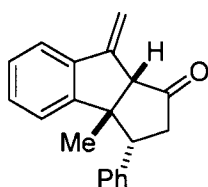

**Eq 2 (cinnamoyl chloride/[Ph<sub>3</sub>SiF<sub>2</sub>]NBu<sub>4</sub>).** **(3R,3aR,8aS)-3a-Methyl-8-methylene-3-phenyl-3,3a,8,8a-tetrahydro-2H-cyclopenta[a]inden-1-one.** The General Procedure was followed, except that cinnamoyl chloride (83.3 mg, 0.50 mmol) and TBAT (269 mg, 0.50 mmol) were used instead of an acid fluoride. (Note: We have established through a separate NMR study that cinnamoyl chloride reacts rapidly with TBAT to form cinnamoyl fluoride)

Isolated as white needles: run 1: 75.3 mg (55%; 72% ee, 92:8 dr); run 2: 72.1 mg (53%; 75% ee, 93:7 dr).

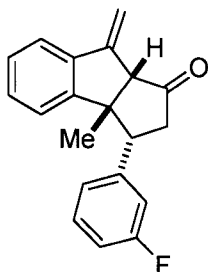

**Table 1, entry 2.** **(3R,3aR,8aS)-3-(3-Fluoro-phenyl)-3a-methyl-8-methylene-3,3a,8,8a-tetrahydro-2H-cyclopenta[a]inden-1-one.** Isolated as a yellow microcrystalline solid: run 1: 76.8 mg (53%; 58% ee, 88:12 dr); run 2: 70.9 mg (49%; 58% ee, 88:12 dr).

Mp 88-91 °C;

<sup>1</sup>H NMR (400 MHz, CDCl<sub>3</sub>) δ 7.47 (d, *J* = 7.7 Hz, 1H), 7.27-7.34 (m, 1H), 7.22 (t, *J* = 7.4 Hz, 1H), 6.97-7.07 (m, 2H), 6.93 (d, *J* = 7.7 Hz, 1H), 6.82 (d, *J* = 10.0 Hz, 1H), 5.97 (d, *J* = 7.8 Hz, 1H), 5.62 (d, *J* = 1.6 Hz, 1H), 5.40 (d, *J* = 1.3 Hz, 1H), 3.61 (dd, *J* = 14.2 Hz, *J* = 6.6

Hz, 1H), 3.32 (d,  $J = 1.2$  Hz, 1H), 2.63 (dd,  $J = 16.5$  Hz,  $J = 14.3$  Hz, 1H), 2.50 (ddd,  $J = 16.6$  Hz,  $J = 6.6$  Hz,  $J = 1.1$  Hz, 1H), 1.59 (s, 3H);

$^{13}\text{C}$  NMR (100 MHz,  $\text{CDCl}_3$ )  $\delta$  213.3, 162.7 (d,  $J = 246$  Hz), 147.2, 145.3, 140.5 (d,  $J = 7.2$  Hz), 140.1, 129.6 (d,  $J = 8.3$  Hz), 128.3, 128.0, 126.7, 124.8, 120.7, 116.0 (d,  $J = 21.4$  Hz), 114.4 (d,  $J = 21.1$  Hz), 106.4, 66.3, 55.2, 51.7, 42.8, 28.0;

IR (film)  $\nu$  3068, 2960, 2925, 1746 (C=O), 1613, 1588, 1489, 14448, 1256, 1219, 1161, 876, 785, 765, 708  $\text{cm}^{-1}$ ;

LCMS ( $\text{ES}^+$ ): calcd for  $\text{C}_{20}\text{H}_{17}\text{F}_1\text{O}_1$  [ $\text{M}^+$ ] 292; found [ $\text{M}+\text{H}^+$ ] 293.

The enantiomeric excess was determined by chiral HPLC analysis: Chiralpak IA, 10.0%  $\text{CH}_2\text{Cl}_2$ :hexanes, 1.0 mL/min, (3*S*,3*aS*,8*aR*):  $t_r$ : 15.4 min; (3*R*,3*aR*,8*aS*):  $t_r$ : 17.1 min.

(3*R*,3*aR*,8*aS*): Using catalyst (-)-2,  $[\alpha]_D^{22} +29^\circ$  ( $c = 0.50$ ,  $\text{CHCl}_3$ ).

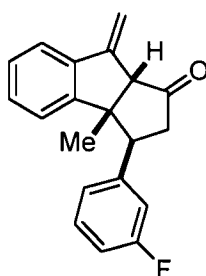

**3-(3-Fluoro-phenyl)-3*a*-methyl-8-methylene-3,3*a*,8,8*a*-tetrahydro-2*H*-cyclopenta[*a*]inden-1-one.** The minor diastereomer was isolated as a white microcrystalline solid.

Mp 114-116  $^\circ\text{C}$ ;

$^1\text{H}$  NMR (400 MHz,  $\text{CDCl}_3$ )  $\delta$  7.51-7.53 (m, 1H), 7.29-7.35 (m, 3H), 7.17-7.19 (m, 1H), 7.00 (tdd,  $J = 8.5$  Hz,  $J = 2.5$  Hz,  $J = 0.8$  Hz, 1H), 6.91 (d (br),  $J = 7.7$  Hz, 1H), 6.86 (dt,  $J = 10.0$  Hz,  $J = 2.1$  Hz, 1H), 5.66 (d,  $J = 2.3$  Hz, 1H), 5.45 (d,  $J = 2.1$  Hz, 1H), 3.48 (t,  $J = 7.7$  Hz, 1H), 3.36 (d,  $J = 1.8$  Hz, 1H), 2.77 (ddd,  $J = 18.0$  Hz,  $J = 7.4$  Hz,  $J = 1.6$  Hz, 1H), 2.65 (dd,  $J = 17.9$  Hz,  $J = 8.0$  Hz, 1H), 1.12 (s, 3H).

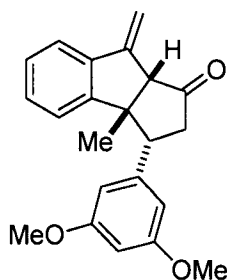

**Table 1, entry 3. (3*R*,3*aR*,8*aS*)-3-(3,5-Dimethoxy-phenyl)-3*a*-methyl-8-methylene-3,3*a*,8,8*a*-tetrahydro-2*H*-cyclopenta[*a*]inden-1-one.** Isolated as a colorless resinous oil: run 1: 103 mg (62%; 71% ee, 89:11 dr); run 2: 100 mg (60%; 69% ee, 89:11 dr).

$^1\text{H}$  NMR (400 MHz,  $\text{CDCl}_3$ )  $\delta$  7.44 (d,  $J = 7.7$  Hz, 1H), 7.19 (td,  $J = 8.0$  Hz,  $J = 0.8$  Hz, 1H), 6.99 (td,  $J = 8.0$  Hz,  $J = 0.8$  Hz, 1H), 6.43 (t,  $J = 2.2$  Hz, 1H), 6.24 (s (br), 2H), 6.12 (d,  $J$

= 7.8 Hz, 1H), 5.59 (d,  $J = 1.9$  Hz, 1H), 5.36 (d,  $J = 1.7$  Hz, 1H), 3.74 (s, 6H), 3.52 (dd,  $J = 14.2$  Hz,  $J = 6.7$  Hz, 1H), 3.28 (d,  $J = 1.7$  Hz, 1H), 2.60 (dd,  $J = 16.6$  Hz,  $J = 14.3$  Hz, 1H), 2.47 (ddd,  $J = 16.6$  Hz,  $J = 6.7$  Hz,  $J = 1.6$  Hz, 1H), 1.58 (s, 3H);

$^{13}\text{C}$  NMR (100 MHz,  $\text{CDCl}_3$ )  $\delta$  213.8, 160.5, 147.6, 145.6, 140.0, 140.0, 128.2, 127.9, 127.1, 120.5, 107.4, 106.2, 99.3, 66.3, 55.5, 55.2, 52.1, 43.0, 28.1;

IR (film)  $\nu$  2958, 2838, 1744 (C=O), 1596, 1461, 1430, 1357, 1205, 1155, 1066, 836, 758  $\text{cm}^{-1}$ ;

LCMS ( $\text{ES}^+$ ): calcd for  $\text{C}_{22}\text{H}_{22}\text{O}_3$  [ $\text{M}^+$ ] 334; found [ $\text{M}+\text{H}^+$ ] 335.

The enantiomeric excess was determined by chiral HPLC analysis: Chiralpak IA, 10.0%  $\text{CH}_2\text{Cl}_2$ :hexanes, 1.0 mL/min, (3*S*,3*aS*,8*aR*):  $t_r$ : 25.9 min; (3*R*,3*aR*,8*aS*):  $t_r$ : 28.7 min.

(3*R*,3*aR*,8*aS*): Using catalyst (-)-**2**,  $[\alpha]_D^{22} +44^\circ$  ( $c = 0.50$ ,  $\text{CHCl}_3$ ).

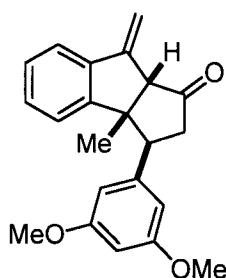

**3-(3,5-Dimethoxyphenyl)-3*a*-methyl-8-methylene-3,3*a*,8,8*a*-tetrahydro-2*H*-cyclopenta[*a*]inden-1-one.** The minor diastereomer was isolated as a yellow resinous solid.

$^1\text{H}$  NMR (400 MHz,  $\text{CDCl}_3$ )  $\delta$  7.50-7.52 (m, 1H), 7.25-7.34 (m, 3H), 6.41-6.44 (m, 1H), 6.29 (d,  $J = 2.2$  Hz, 2H), 5.66 (d,  $J = 2.3$  Hz, 1H), 5.45 (d,  $J = 2.0$  Hz, 1H), 3.81 (s, 6H), 3.44 (dd,  $J = 7.6$  Hz,  $J = 7.5$  Hz, 1H), 3.36 (d,  $J = 1.7$  Hz, 1H), 2.77 (ddd,  $J = 17.9$  Hz,  $J = 7.1$  Hz,  $J = 1.6$  Hz, 1H), 2.62 (dd,  $J = 17.9$  Hz,  $J = 8.0$  Hz, 1H), 1.15 (s, 3H).

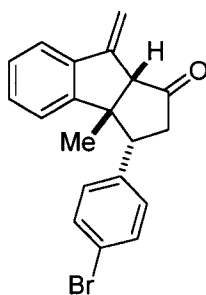

**Table 1, entry 4. (3*R*,3*aR*,8*aS*)-3-(4-Bromo-phenyl)-3*a*-methyl-8-methylene-3,3*a*,8,8*a*-tetrahydro-2*H*-cyclopenta[*a*]inden-1-one.** Isolated as white prisms: run 1: 89.4 mg (51%; 69% ee, 90:10 dr); run 2: 92.0 mg (52%; 70% ee, 89:11 dr).

Mp 135-137  $^\circ\text{C}$ ;

$^1\text{H}$  NMR (400 MHz,  $\text{CDCl}_3$ )  $\delta$  7.45-7.47 (m, 3H), 7.19-7.22 (m, 1H), 6.97-7.01 (m, 3H), 5.97 (d,  $J = 7.8$  Hz, 1H), 5.60 (d,  $J = 1.9$  Hz, 1H), 5.37 (d,  $J = 1.7$  Hz, 1H), 3.55 (dd,  $J = 14.3$

Hz,  $J = 6.6$  Hz, 1H), 3.30 (d,  $J = 1.7$  Hz, 1H), 2.61 (dd,  $J = 16.5$  Hz,  $J = 14.3$  Hz, 1H), 2.47 (ddd,  $J = 16.5$  Hz,  $J = 6.6$  Hz,  $J = 1.6$  Hz, 1H), 1.55 (s, 3H);

$^{13}\text{C}$  NMR (100 MHz,  $\text{CDCl}_3$ )  $\delta$  213.3, 147.2, 145.3, 140.1, 136.7, 131.3, 130.8, 128.4, 128.0, 126.8, 121.4, 120.7, 106.4, 66.2, 55.1, 51.4, 42.8, 27.9;

IR (film)  $\nu$  3066, 2959, 2920, 1746 (C=O), 1694, 1489, 1411, 1186, 1074, 1010, 821, 769, 755  $\text{cm}^{-1}$ ;

LCMS ( $\text{ES}^+$ ): calcd for  $\text{C}_{20}\text{H}_{17}\text{Br}_1\text{O}_1$  [ $\text{M}^+$ ] 352/354; found [ $\text{M}+\text{H}^+$ ] 353/355.

The enantiomeric excess was determined by chiral HPLC analysis: Chiralpak IA, 10.0%  $\text{CH}_2\text{Cl}_2$ :hexanes, 1.0 mL/min, (3*R*,3*aR*,8*aS*):  $t_r$ : 17.1 min; (3*S*,3*aS*,8*aR*):  $t_r$ : 18.1 min.

(3*R*,3*aR*,8*aS*): Using catalyst (-)-2,  $[\alpha]_D^{22} +1.5^\circ$  ( $c = 0.50$ ,  $\text{CHCl}_3$ ).

Crystals (from the reaction catalyzed by (+)-2) suitable for X-ray crystallographic analysis were obtained through crystallization from  $\text{CH}_2\text{Cl}_2$ /pentane.

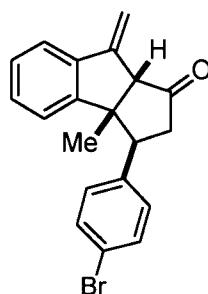

**3-(4-Bromo-phenyl)-3a-methyl-8-methylene-3,3a,8,8a-tetrahydro-2H-cyclopenta[a]inden-1-one.** The minor diastereomer was isolated as a resinous solid.

$^1\text{H}$  NMR (400 MHz,  $\text{CDCl}_3$ )  $\delta$  7.47-7.53 (m, 3H), 7.29-7.34 (m, 2H), 7.12-7.16 (m, 1H), 6.99-7.03 (m, 2H), 5.66 (d,  $J = 2.4$  Hz, 1H), 5.45 (d,  $J = 2.2$  Hz, 1H), 3.43 (dd,  $J = 7.9$  Hz,  $J = 7.8$  Hz, 1H), 3.36 (d,  $J = 1.8$  Hz, 1H), 2.76 (ddd,  $J = 17.9$  Hz,  $J = 7.9$  Hz,  $J = 1.6$  Hz, 1H), 2.64 (dd,  $J = 17.9$  Hz,  $J = 7.9$  Hz, 1H), 1.11 (s, 3H).

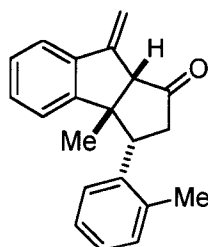

**Table 1, entry 5. (3*R*,3*aR*,8*aS*)-3a-Methyl-8-methylene-3-*o*-tolyl-3,3a,8,8a-tetrahydro-2H-cyclopenta[a]inden-1-one.** Isolated as white needles: run 1: 57.8 mg (40%; 65% ee, 88:12 dr); run 2: 59.4 mg (41%; 66% ee, 87:13 dr).

Mp 102-104  $^\circ\text{C}$ ;

$^1\text{H}$  NMR (400 MHz,  $\text{CDCl}_3$ )  $\delta$  7.49 (d,  $J = 7.8$  Hz, 1H), 7.16-7.28 (m, 3H), 7.00-7.04 (m, 2H), 6.61 (d,  $J = 7.7$  Hz, 1H), 6.21 (d,  $J = 7.8$  Hz, 1H), 5.64 (d,  $J = 2.1$  Hz, 1H), 5.42 (d,  $J = 1.9$  Hz, 1H), 3.97 (dd,  $J = 13.6$  Hz,  $J = 7.0$  Hz, 1H), 3.36 (d,  $J = 1.9$  Hz, 1H), 2.68 (dd,  $J =$

16.8 Hz,  $J = 13.6$  Hz, 1H), 2.56 (s, 3H), 2.53 (ddd,  $J = 16.8$  Hz,  $J = 7.0$  Hz,  $J = 1.7$  Hz, 1H), 1.57 (s, 3H);

$^{13}\text{C}$  NMR (100 MHz,  $\text{CDCl}_3$ )  $\delta$  214.2, 147.9, 145.6, 140.1, 137.0, 136.3, 130.8, 129.3, 128.0, 127.8, 127.6, 127.0, 125.2, 120.5, 106.0, 66.4, 56.2, 46.7, 45.1, 29.1, 20.9;

IR (film)  $\nu$  3065, 3024, 2925, 2958, 1743 (C=O), 1637, 1463, 1408, 1218, 1182, 1025, 881, 766, 730  $\text{cm}^{-1}$ ;

LCMS ( $\text{ES}^+$ ): calcd for  $\text{C}_{21}\text{H}_{20}\text{O}_1$  [ $\text{M}^+$ ] 288; found [ $\text{M}+\text{H}^+$ ] 289.

The enantiomeric excess was determined by chiral HPLC analysis: Chiralpak IA, 10.0%  $\text{CH}_2\text{Cl}_2$ :hexanes, 1.0 mL/min, (3*S*,3*aS*,8*aR*):  $t_r$ : 11.4 min; (3*R*,3*aR*,8*aS*):  $t_r$ : 18.4 min.

(3*R*,3*aR*,8*aS*): Using catalyst (-)-**2**,  $[\alpha]_D^{22} +58^\circ$  ( $c = 0.50$ ,  $\text{CHCl}_3$ ).

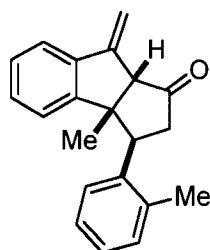

**3a-Methyl-8-methylene-3-o-tolyl-3,3a,8,8a-tetrahydro-2H-cyclopenta[*a*]inden-1-one.** The minor diastereomer was isolated as a white microcrystalline solid.

Mp 95-96  $^\circ\text{C}$ ;

$^1\text{H}$  NMR (400 MHz,  $\text{CDCl}_3$ )  $\delta$  7.49-7.52 (m, 1H), 7.18-7.34 (m, 6H), 7.05 (d,  $J = 7.6$  Hz, 1H), 5.65 (d,  $J = 1.9$  Hz, 1H), 5.44 (d,  $J = 1.8$  Hz, 1H), 3.94 (dd,  $J = 6.6$  Hz,  $J = 6.5$  Hz, 1H), 3.32 (s, 1H), 2.63 (d,  $J = 6.8$  Hz, 2H), 2.33 (s, 3H), 1.09 (s, 3H).

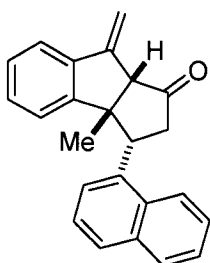

**Table 1, entry 6. (3*R*,3*aR*,8*aS*)-3a-Methyl-8-methylene-3-naphthalen-1-yl-3,3a,8,8a-tetrahydro-2H-cyclopenta[*a*]inden-1-one.** Isolated as a white microcrystalline solid: run 1: 69.3 mg (43%; 67% ee, 90:10 dr); run 2: 65.1 mg (40%; 73% ee, 90:10 dr).

Mp 142-143  $^\circ\text{C}$ ;

$^1\text{H}$  NMR (400 MHz,  $\text{CDCl}_3$ )  $\delta$  8.40 (d,  $J = 8.5$  Hz, 1H), 7.94 (d,  $J = 7.9$  Hz, 1H), 7.81 (d,  $J = 8.1$  Hz, 1H), 7.54-7.64 (m, 2H), 7.47 (d,  $J = 7.7$  Hz, 1H), 7.32 (dd,  $J = 7.8$  Hz,  $J = 7.7$  Hz, 1H), 7.18 (dd,  $J = 7.6$  Hz,  $J = 7.4$  Hz, 1H), 6.85-6.87 (m, 2H), 5.82 (d,  $J = 7.8$  Hz, 1H), 5.65 (d,  $J = 1.9$  Hz, 1H), 5.45 (dd,  $J = 1.7$  Hz, 1H), 4.62 (dd,  $J = 13.6$  Hz,  $J = 6.6$  Hz, 1H), 3.44 (d,  $J = 1.6$  Hz, 1H), 2.88 (dd,  $J = 16.6$  Hz,  $J = 13.8$  Hz, 1H), 2.61 (ddd,  $J = 16.6$  Hz,  $J = 6.6$  Hz,  $J = 1.6$  Hz, 1H), 1.61 (s, 3H);

$^{13}\text{C}$  NMR (100 MHz,  $\text{CDCl}_3$ )  $\delta$  214.0, 147.9, 145.7, 140.0, 134.2, 134.1, 133.1, 129.2, 127.9, 127.8 (2), 127.5, 126.5, 126.1, 125.7, 124.8, 124.1, 120.5, 106.1, 66.7, 56.4, 45.3, 44.8, 29.1;

IR (film)  $\nu$  3049, 2958, 1741 (C=O), 1639, 1598, 1512, 1462, 1408, 1264, 1220, 1189, 882, 778, 760, 736  $\text{cm}^{-1}$ ;

LCMS ( $\text{ES}^+$ ): calcd for  $\text{C}_{24}\text{H}_{20}\text{O}_1$  [ $\text{M}^+$ ] 324; found [ $\text{M}+\text{H}^+$ ] 325;

The enantiomeric excess was determined by chiral HPLC analysis: Chiralpak IA, 10.0%  $\text{CH}_2\text{Cl}_2$ :hexanes, 1.0 mL/min, (3*S*,3*aS*,8*aR*):  $t_r$ : 15.3 min; (3*R*,3*aR*,8*aS*):  $t_r$ : 24.7 min.

(3*R*,3*aR*,8*aS*): Using catalyst (-)-**2**,  $[\alpha]_D^{22} +27^\circ$  ( $c = 0.50$ ,  $\text{CHCl}_3$ ).

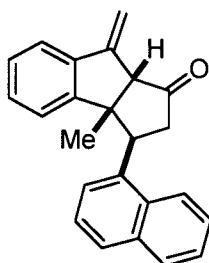

**3a-Methyl-8-methylene-3-naphthalen-1-yl-3,3a,8,8a-tetrahydro-2H-cyclopenta[a]inden-1-one.** The minor diastereomer was isolated as a yellow microcrystalline solid.

Mp 161-164  $^\circ\text{C}$  (dec.);

$^1\text{H}$  NMR (400 MHz,  $\text{CDCl}_3$ ) 8.08-8.10 (m, 1H), 7.90-7.93 (m, 1H), 7.81 (d,  $J = 8.2$  Hz, 1H), 7.48-7.57 (m, 4H), 7.39-7.41 (m, 1H), 7.31-7.36 (m, 2H), 7.26-7.29 (m, 1H), 5.68 (d,  $J = 1.8$  Hz, 1H), 5.47 (d,  $J = 1.7$  Hz, 1H), 4.62 (dd,  $J = 7.5$  Hz,  $J = 5.1$  Hz, 1H), 3.35 (d,  $J = 1.1$  Hz, 1H), 2.74-2.86 (m, 2H), 1.02 (s, 3H).

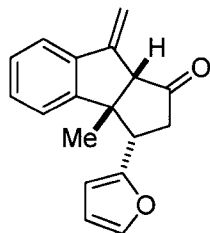

**Table 1, entry 7. (3*R*,3*aR*,8*aS*)-3-Furan-2-yl-3a-methyl-8-methylene-3,3a,8,8a-tetrahydro-2H-cyclopenta[a]inden-1-one.** Isolated as a yellow resinous solid: run 1: 63.8 mg (48%; 74% ee, 87:13 dr); run 2: 59.2 mg (45%; 76% ee, 83:17 dr);

$^1\text{H}$  NMR (400 MHz,  $\text{CDCl}_3$ )  $\delta$  7.45-7.46 (m, 1H), 7.43 (d,  $J = 7.7$  Hz, 1H), 7.20 (ddd,  $J = 7.8$  Hz,  $J = 7.4$  Hz,  $J = 1.1$  Hz, 1H), 7.02-7.06 (m, 1H), 6.39 (dd,  $J = 3.2$  Hz,  $J = 1.9$  Hz, 1H), 6.02-6.05 (m, 2H), 5.59 (d,  $J = 1.7$  Hz, 1H), 5.35 (d,  $J = 1.6$  Hz, 1H), 3.62 (dd,  $J = 10.6$  Hz,  $J = 10.3$  Hz, 1H), 3.24 (s, 1H), 2.55 (d (br),  $J = 10.8$  Hz, 2H), 1.65 (s, 3H);

$^{13}\text{C}$  NMR (100 MHz,  $\text{CDCl}_3$ )  $\delta$  213.6, 153.5, 147.8, 145.4, 141.6, 139.8, 128.8, 127.9, 125.4, 120.5, 110.7, 107.6, 106.4, 66.3, 55.5, 45.0, 41.5, 28.1;

IR (film)  $\nu$  3471, 3117, 3068, 2959, 2925, 2868, 1746 (C=O), 1638, 1505, 1463, 1321, 1219, 1183, 1157, 1010, 885, 764, 737  $\text{cm}^{-1}$ ;

LCMS (ES<sup>+</sup>): calcd for C<sub>18</sub>H<sub>16</sub>O<sub>2</sub> [M<sup>+</sup>] 264; found [M+H<sup>+</sup>] 265.

The enantiomeric excess was determined by chiral HPLC analysis: Chiralpak AS-H, 5.0% *i*-PrOH:hexanes, 1.0 mL/min, (3*S*,3*aS*,8*aR*):  $t_r$ : 10.5 min; (3*R*,3*aR*,8*aS*):  $t_r$ : 14.8 min.

(3*R*,3*aR*,8*aS*): Using catalyst (-)-**2**,  $[\alpha]_D^{22} +32^\circ$  ( $c = 0.50$ , CHCl<sub>3</sub>).

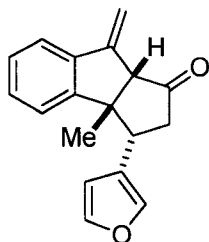

**Table 1, entry 8. (3*R*,3*aR*,8*aS*)-3-Furan-3-yl-3a-methyl-8-methylene-3,3a,8,8a-tetrahydro-2*H*-cyclopenta[*a*]inden-1-one.** Isolated as a yellow microcrystalline solid: run 1: 62.3 mg (47%; 77% ee, 88:12 dr); run 2: 65.0 mg (49%; 77% ee, 92:8 dr).

Mp 96-98 °C;

<sup>1</sup>H NMR (400 MHz, CDCl<sub>3</sub>)  $\delta$  7.43-7.47 (m, 2H), 7.20-7.23 (m, 2H), 7.07 (t,  $J = 7.5$  Hz, 1H), 6.47 (d,  $J = 7.8$  Hz, 1H), 6.29 (s, 1H), 5.59 (d,  $J = 1.6$  Hz, 1H), 5.36 (d,  $J = 1.4$  Hz, 1H), 3.44 (dd,  $J = 14.1$  Hz,  $J = 6.6$  Hz, 1H), 3.25 (d,  $J = 1.3$  Hz, 1H), 2.50 (ddd,  $J = 16.7$  Hz,  $J = 6.6$  Hz,  $J = 1.3$  Hz, 1H), 2.38 (dd,  $J = 16.6$  Hz,  $J = 14.1$  Hz, 1H), 1.57 (s, 3H);

<sup>13</sup>C NMR (100 MHz, CDCl<sub>3</sub>)  $\delta$  213.3, 147.8, 145.4, 143.1, 140.2, 140.1, 128.5, 127.9, 126.5, 122.7, 120.6, 111.4, 106.4, 66.4, 54.7, 43.2, 42.9, 27.8;

IR (film)  $\nu$  3132, 3070, 2924, 2959, 2867, 1745 (C=O), 1639, 1503, 1463, 1184, 1163, 1037, 1024, 874, 785, 764  $\text{cm}^{-1}$ ;

LCMS (ES<sup>+</sup>): calcd for C<sub>18</sub>H<sub>16</sub>O<sub>2</sub> [M<sup>+</sup>] 264; found [M+H<sup>+</sup>] 265.

The enantiomeric excess was determined by chiral HPLC analysis: Chiralpak IA, 10.0% CH<sub>2</sub>Cl<sub>2</sub>:hexanes, 1.0 mL/min, (3*S*,3*aS*,8*aR*):  $t_r$ : 14.8 min; (3*R*,3*aR*,8*aS*):  $t_r$ : 20.4 min.

(3*R*,3*aR*,8*aS*): Using catalyst (-)-**2**,  $[\alpha]_D^{22} +77^\circ$  ( $c = 0.50$ , CHCl<sub>3</sub>).

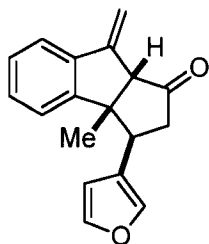

**3-Furan-3-yl-3a-methyl-8-methylene-3,3a,8,8a-tetrahydro-2*H*-cyclopenta[*a*]inden-1-one.** The minor diastereomer was isolated as a yellow resinous solid.

<sup>1</sup>H NMR (400 MHz, CDCl<sub>3</sub>)  $\delta$  7.49-7.03 (m, 1H), 7.45-7.46 (m, 1H), 7.25-7.35 (m, 4H), 6.32 (s (br), 1H), 5.65 (d,  $J = 2.0$  Hz, 1H), 5.44 (d,  $J = 2.0$  Hz, 1H), 3.38 (dd,  $J = 8.0$  Hz,  $J = 7.6$  Hz, 1H), 3.32 (t,  $J = 2.0$  Hz, 1H), 2.61 (d,  $J = 7.6$  Hz, 2H), 1.25 (s, 3H).



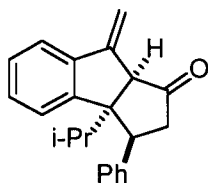

**Eq 3. (3S,3aS,8aR)-3a-Isopropyl-8-methylene-3-phenyl-3,3a,8,8a-tetrahydro-2H-cyclopenta[a]inden-1-one.** Isolated as a yellow resinous oil: run 1: 65.7 mg (44%; 81% ee, **D**:**E** = 87:13); run 2: 63.1 mg (42%; 81% ee, **D**:**E** = 86:14). The diastereomer of **D** could not be detected.

$^1\text{H}$  NMR (400 MHz,  $\text{CDCl}_3$ ) (contains 6% of **E**)  $\delta$  7.44 (d,  $J = 7.7$  Hz, 1H), 7.27-7.31 (m, 3H), 7.17 (td,  $J = 7.5$  Hz,  $J = 0.9$  Hz, 1H), 7.00-7.06 (m, 2H), 6.89 (td,  $J = 7.5$  Hz,  $J = 0.9$  Hz, 1H), 5.80 (d,  $J = 7.8$  Hz, 1H), 5.55 (d,  $J = 1.9$  Hz, 1H), 5.36 (d,  $J = 1.8$  Hz, 1H), 3.96 (dd,  $J = 14.1$  Hz,  $J = 6.6$  Hz, 1H), 3.44 (d,  $J = 1.7$  Hz, 1H), 2.67 (dd,  $J = 16.2$  Hz,  $J = 14.2$  Hz, 1H), 2.43 (ddd,  $J = 16.2$  Hz,  $J = 6.6$  Hz,  $J = 1.8$  Hz, 1H), 2.32 (sept,  $J = 6.8$  Hz, 1H), 1.29 (d,  $J = 6.7$  Hz, 3H), 0.44 (d,  $J = 6.8$  Hz, 3H);

$^{13}\text{C}$  NMR (100 MHz,  $\text{CDCl}_3$ )  $\delta$  213.7, 146.9, 146.9, 140.9, 138.4, 129.2, 128.1, 127.9, 127.7, 127.3, 127.2, 120.3, 105.2, 63.2, 58.9, 45.6, 42.8, 33.3, 19.0, 18.7;

IR (film)  $\nu$  3064, 3030, 2962, 2875, 1744 (C=O), 1637, 1498, 1470, 1453, 1390, 1311, 1185, 1147, 1129, 880, 769, 701  $\text{cm}^{-1}$ ;

LCMS ( $\text{ES}^+$ ): calcd for  $\text{C}_{22}\text{H}_{22}\text{O}_1$  [ $\text{M}^+$ ] 302; found [ $\text{M}+\text{H}^+$ ] 303.

The enantiomeric excess was determined by chiral HPLC analysis: Chiralpak IA, 10.0%  $\text{CH}_2\text{Cl}_2$ :hexanes, 1.0 mL/min, (3S,3aS,8aR):  $t_r$ : 10.5 min; (3R,3aR,8aS):  $t_r$ : 11.6 min.

(3S,3aS,8aR): Using catalyst (+)-**2**,  $[\alpha]_D^{22} -57^\circ$  ( $c = 0.50$ ,  $\text{CHCl}_3$ ).

## References

- (1) Ready, T. E.; Chien, J. C. W.; Rausch, M. D. *J. Organomet. Chem.* **1999**, *583*, 11-27.
- (2) Plusquellec, D.; Roulleau, F.; Lefeuvre, M.; Brown, E. *Tetrahedron* **1988**, *44*, 2471-2476.
- (3) This is based on a literature procedure: Biesalski, H.-K.; Doepner, G.; Kunz, H.; Paust, J.; John, M. *Liebigs Ann. Chem.* **1995**, *4*, 717-20.

## V. X-Ray Crystal Structures

Both crystals were prepared with (+)-2.

**N-Cinnamoylated catalyst (Figure 2).** In a glove box, a solution of cinnamoyl chloride (18.1 mg, 109  $\mu\text{mol}$ ) in dry  $\text{CH}_2\text{Cl}_2$  (2.0 mL) was added to (+)-2 (40.0 mg, 109  $\mu\text{mol}$ ). The resulting dark-green solution was stirred for 20 minutes, and then a solution of  $\text{AgPF}_6$  (28.1 mg, 111  $\mu\text{mol}$ ) in dry acetonitrile (1.4 mL) was added. The reaction mixture was stirred for 30 minutes, and then the gray precipitate was removed by filtration through an acrodisc (rinsed with dry  $\text{CH}_2\text{Cl}_2$  (2.0 mL)). The resulting clear, dark-green solution was concentrated under reduced pressure. The green oil was dissolved in dry THF, and then pentane was added. The solvent was removed, furnishing a green amorphous powder (65.2 mg, 93%). Crystals suitable for X-ray crystallography were grown from  $\text{CH}_2\text{Cl}_2$ /pentane.

Mp 225-227  $^\circ\text{C}$  (dec.);

$^1\text{H}$  NMR (400 MHz,  $\text{CD}_2\text{Cl}_2$ )  $\delta$  8.31 (s (br), 1H), 8.02 (d,  $J = 14.2$  Hz, 1H), 7.72 (s (br), 2H), 7.49 (s (br), 3H), 7.24 (d,  $J = 15.0$  Hz, 1H), 6.18 (s (br), 1H), 5.78 (d,  $J = 2.0$  Hz, 1H), 4.57 (s, 1H), 4.39 (s, 1H), 3.68-3.87 (m, 4H), 2.20-2.28 (m, 4H), 1.57 (s, 15H);

$^{13}\text{C}$  NMR (100 MHz,  $\text{CD}_2\text{Cl}_2$ )  $\delta$  166.3, 165.6, 150.5, 140.1, 134.3, 132.2, 130.3, 129.7, 116.0, 99.6, 98.1, 82.7, 79.7, 69.7, 68.5, 68.1, 26.5, 24.9, 10.1;

IR (film)  $\nu$  2972, 2909, 1701, 1608 (C=O), 1576, 1505, 1452, 1327, 1238, 1199, 1159, 1115, 1065, 840, 765  $\text{cm}^{-1}$ ;

MS (ESI<sup>+</sup>) calcd for  $\text{C}_{31}\text{H}_{35}\text{Fe}_1\text{N}_2\text{O}_1$  [ $\text{M}^+$ ] 507, found: 507.

A colorless plate of dimensions 0.20 x 0.20 x 0.05  $\text{mm}^3$  was mounted under oil and transferred to a Siemens Platform three-circle diffractometer coupled to a Bruker-AXS Apex CCD detector and equipped with an Oxford Cryostream low-temperature device. Diffraction data were collected with graphite monochromated Mo  $K\alpha$  radiation ( $\lambda = 0.71073\text{\AA}$ ), performing  $\phi$ - and  $\omega$ -scans. The unit cell parameters were determined with the diffractometer control software SMART<sup>1</sup>, and the raw data were integrated and reduced using the program SAINT,<sup>2</sup> version 7.23. Semi-empirical absorption correction was performed with SADABS.<sup>3</sup> The structure was solved by direct methods using SHELXS<sup>4</sup> and refined against  $F^2$  on all data by full-matrix least squares with SHELXL-97.<sup>5</sup>

The structure was solved and refined in the tetragonal space group  $P4_32_12$ . All non-hydrogen atoms were refined anisotropically. All hydrogen atoms were included into the model at geometrically calculated positions and refined using a riding model. The isotropic displacement parameters for the hydrogen atoms were constrained to 1.2 times the  $U_{eq}$  value of the atoms they are linked to (1.5 times for methyl groups). The Flack- $x$  parameter<sup>6</sup> refined to -0.008(14), confirming the absolute stereochemistry.

Table 1 gives details about unit cell, data quality, and the residual values of the refinement.

## References

- (1) SMART *Software for the CCD Detector System*; Bruker AXS, Madison, WI (2003).
- (2) SAINT *Software for the CCD Detector System*; Bruker AXS, Madison, WI (2003).
- (3) SADABS *Program for absorption (and other) corrections*; Bruker AXS, Madison, WI (2005).
- (4) Sheldrick, G. M. *Acta Cryst.* **1990**, A46, 467-473.
- (5) Sheldrick, G. M. *SHELXL-97, Program for the Refinement of Crystal Structures*, University of Göttingen, Germany, 1997.
- (6) Flack, H. D. *Acta Cryst.* **1983**, A39, 876-881.

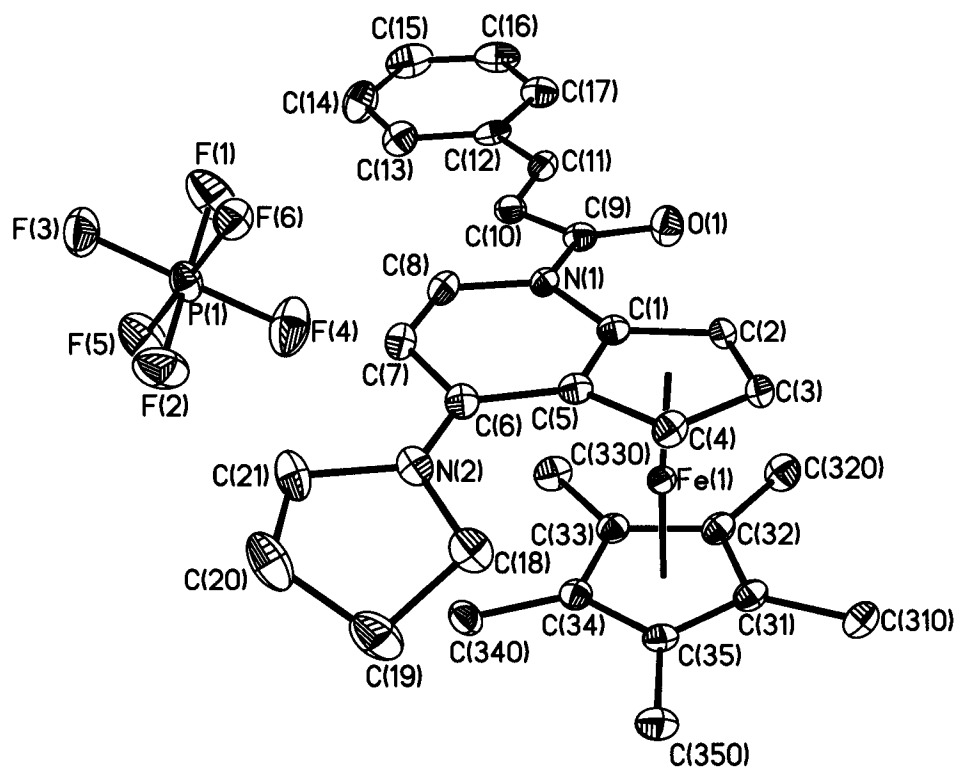

Table 1. Crystal data and structure refinement for 05261.

|                                   |                                                                      |                       |
|-----------------------------------|----------------------------------------------------------------------|-----------------------|
| Identification code               | 05261                                                                |                       |
| Empirical formula                 | C <sub>31</sub> H <sub>35</sub> F <sub>6</sub> Fe N <sub>2</sub> O P |                       |
| Formula weight                    | 652.43                                                               |                       |
| Temperature                       | 100(2) K                                                             |                       |
| Wavelength                        | 0.71073 Å                                                            |                       |
| Crystal system                    | Tetragonal                                                           |                       |
| Space group                       | P4(3)2(1)2                                                           |                       |
| Unit cell dimensions              | a = 11.9811(3) Å                                                     | $\alpha = 90^\circ$ . |
|                                   | b = 11.9811(3) Å                                                     | $\beta = 90^\circ$ .  |
|                                   | c = 40.4968(19) Å                                                    | $\gamma = 90^\circ$ . |
| Volume                            | 5813.2(3) Å <sup>3</sup>                                             |                       |
| Z                                 | 8                                                                    |                       |
| Density (calculated)              | 1.491 Mg/m <sup>3</sup>                                              |                       |
| Absorption coefficient            | 0.641 mm <sup>-1</sup>                                               |                       |
| F(000)                            | 2704                                                                 |                       |
| Crystal size                      | 0.20 x 0.20 x 0.05 mm <sup>3</sup>                                   |                       |
| Theta range for data collection   | 1.77 to 28.70°.                                                      |                       |
| Index ranges                      | -16 ≤ h ≤ 16, -16 ≤ k ≤ 16, -54 ≤ l ≤ 54                             |                       |
| Reflections collected             | 124357                                                               |                       |
| Independent reflections           | 7504 [R(int) = 0.0955]                                               |                       |
| Completeness to theta = 28.70°    | 100.0 %                                                              |                       |
| Absorption correction             | Semi-empirical from equivalents                                      |                       |
| Max. and min. transmission        | 0.9686 and 0.8825                                                    |                       |
| Refinement method                 | Full-matrix least-squares on F <sup>2</sup>                          |                       |
| Data / restraints / parameters    | 7504 / 0 / 384                                                       |                       |
| Goodness-of-fit on F <sup>2</sup> | 1.074                                                                |                       |
| Final R indices [I > 2σ(I)]       | R1 = 0.0405, wR2 = 0.0862                                            |                       |
| R indices (all data)              | R1 = 0.0501, wR2 = 0.0904                                            |                       |
| Absolute structure parameter      | -0.008(14)                                                           |                       |
| Largest diff. peak and hole       | 0.542 and -0.335 e.Å <sup>-3</sup>                                   |                       |

Table 2. Atomic coordinates ( $\times 10^4$ ) and equivalent isotropic displacement parameters ( $\text{\AA}^2 \times 10^3$ ) for 05261.  $U(\text{eq})$  is defined as one third of the trace of the orthogonalized  $U^{ij}$  tensor.

|        | x        | y        | z       | $U(\text{eq})$ |
|--------|----------|----------|---------|----------------|
| Fe(1)  | 213(1)   | 9834(1)  | 829(1)  | 14(1)          |
| O(1)   | -1468(2) | 7362(2)  | 387(1)  | 27(1)          |
| N(1)   | -1767(2) | 9238(2)  | 366(1)  | 16(1)          |
| N(2)   | -782(2)  | 12607(2) | 424(1)  | 19(1)          |
| C(1)   | -616(2)  | 9491(2)  | 401(1)  | 16(1)          |
| C(2)   | 324(2)   | 8781(2)  | 431(1)  | 17(1)          |
| C(3)   | 1284(2)  | 9468(2)  | 445(1)  | 18(1)          |
| C(4)   | 965(2)   | 10607(2) | 433(1)  | 18(1)          |
| C(5)   | -232(2)  | 10644(2) | 404(1)  | 16(1)          |
| C(6)   | -1035(2) | 11543(2) | 391(1)  | 17(1)          |
| C(7)   | -2167(2) | 11201(2) | 336(1)  | 20(1)          |
| C(8)   | -2477(2) | 10123(2) | 325(1)  | 19(1)          |
| C(9)   | -2148(2) | 8116(2)  | 385(1)  | 19(1)          |
| C(10)  | -3363(2) | 7904(2)  | 408(1)  | 20(1)          |
| C(11)  | -3709(2) | 6849(2)  | 401(1)  | 20(1)          |
| C(12)  | -4855(2) | 6427(2)  | 412(1)  | 20(1)          |
| C(13)  | -5782(2) | 7128(2)  | 418(1)  | 26(1)          |
| C(14)  | -6849(2) | 6677(2)  | 405(1)  | 32(1)          |
| C(15)  | -7001(2) | 5532(3)  | 387(1)  | 34(1)          |
| C(16)  | -6091(2) | 4827(3)  | 392(1)  | 31(1)          |
| C(17)  | -5023(2) | 5277(2)  | 404(1)  | 25(1)          |
| C(18)  | 318(2)   | 13063(2) | 523(1)  | 25(1)          |
| C(19)  | 12(2)    | 14204(2) | 666(1)  | 36(1)          |
| C(20)  | -952(2)  | 14578(2) | 447(1)  | 34(1)          |
| C(21)  | -1626(2) | 13511(2) | 401(1)  | 26(1)          |
| C(31)  | 1083(2)  | 9472(2)  | 1248(1) | 19(1)          |
| C(32)  | 138(2)   | 8749(2)  | 1215(1) | 19(1)          |
| C(33)  | -845(2)  | 9435(2)  | 1208(1) | 18(1)          |
| C(34)  | -501(2)  | 10570(2) | 1238(1) | 18(1)          |
| C(35)  | 686(2)   | 10600(2) | 1262(1) | 18(1)          |
| C(310) | 2283(2)  | 9115(2)  | 1265(1) | 23(1)          |

|        |          |          |         |       |
|--------|----------|----------|---------|-------|
| C(320) | 160(2)   | 7496(2)  | 1198(1) | 25(1) |
| C(330) | -2028(2) | 9037(2)  | 1184(1) | 24(1) |
| C(340) | -1278(2) | 11557(2) | 1250(1) | 23(1) |
| C(350) | 1389(2)  | 11623(2) | 1316(1) | 24(1) |
| P(1)   | -5624(1) | 11081(1) | 450(1)  | 25(1) |
| F(1)   | -6222(2) | 9967(1)  | 315(1)  | 48(1) |
| F(2)   | -5004(2) | 12179(1) | 568(1)  | 46(1) |
| F(3)   | -6452(1) | 11803(2) | 227(1)  | 42(1) |
| F(4)   | -4801(2) | 10329(2) | 665(1)  | 52(1) |
| F(5)   | -6481(2) | 11146(2) | 748(1)  | 46(1) |
| F(6)   | -4769(1) | 10994(1) | 143(1)  | 29(1) |

---



Table 3. Bond lengths [Å] and angles [°] for 05261.

---

|             |          |
|-------------|----------|
| Fe(1)-C(32) | 2.034(2) |
| Fe(1)-C(31) | 2.035(2) |
| Fe(1)-C(1)  | 2.040(2) |
| Fe(1)-C(33) | 2.045(2) |
| Fe(1)-C(5)  | 2.046(2) |
| Fe(1)-C(2)  | 2.052(2) |
| Fe(1)-C(35) | 2.059(2) |
| Fe(1)-C(34) | 2.060(2) |
| Fe(1)-C(4)  | 2.060(2) |
| Fe(1)-C(3)  | 2.063(2) |
| O(1)-C(9)   | 1.217(3) |
| N(1)-C(8)   | 1.369(3) |
| N(1)-C(1)   | 1.419(3) |
| N(1)-C(9)   | 1.422(3) |
| N(2)-C(6)   | 1.317(3) |
| N(2)-C(18)  | 1.481(3) |
| N(2)-C(21)  | 1.485(3) |
| C(1)-C(2)   | 1.416(3) |
| C(1)-C(5)   | 1.456(3) |
| C(2)-C(3)   | 1.416(3) |
| C(3)-C(4)   | 1.418(3) |
| C(4)-C(5)   | 1.439(3) |
| C(5)-C(6)   | 1.445(3) |
| C(6)-C(7)   | 1.435(3) |
| C(7)-C(8)   | 1.344(3) |
| C(9)-C(10)  | 1.480(3) |
| C(10)-C(11) | 1.330(3) |
| C(11)-C(12) | 1.464(3) |
| C(12)-C(17) | 1.392(3) |
| C(12)-C(13) | 1.394(4) |
| C(13)-C(14) | 1.389(4) |
| C(14)-C(15) | 1.386(4) |
| C(15)-C(16) | 1.380(4) |
| C(16)-C(17) | 1.390(3) |

|              |            |
|--------------|------------|
| C(18)-C(19)  | 1.528(3)   |
| C(19)-C(20)  | 1.524(4)   |
| C(20)-C(21)  | 1.523(4)   |
| C(31)-C(32)  | 1.432(3)   |
| C(31)-C(35)  | 1.434(3)   |
| C(31)-C(310) | 1.502(3)   |
| C(32)-C(33)  | 1.436(3)   |
| C(32)-C(320) | 1.503(3)   |
| C(33)-C(34)  | 1.426(3)   |
| C(33)-C(330) | 1.499(3)   |
| C(34)-C(35)  | 1.426(3)   |
| C(34)-C(340) | 1.506(3)   |
| C(35)-C(350) | 1.503(3)   |
| P(1)-F(2)    | 1.5850(17) |
| P(1)-F(5)    | 1.5884(17) |
| P(1)-F(4)    | 1.5942(18) |
| P(1)-F(3)    | 1.5954(18) |
| P(1)-F(1)    | 1.6101(18) |
| P(1)-F(6)    | 1.6133(16) |

|                   |            |
|-------------------|------------|
| C(32)-Fe(1)-C(31) | 41.20(10)  |
| C(32)-Fe(1)-C(1)  | 120.17(9)  |
| C(31)-Fe(1)-C(1)  | 156.03(10) |
| C(32)-Fe(1)-C(33) | 41.21(10)  |
| C(31)-Fe(1)-C(33) | 69.13(9)   |
| C(1)-Fe(1)-C(33)  | 106.76(9)  |
| C(32)-Fe(1)-C(5)  | 159.60(10) |
| C(31)-Fe(1)-C(5)  | 159.09(10) |
| C(1)-Fe(1)-C(5)   | 41.75(9)   |
| C(33)-Fe(1)-C(5)  | 125.41(9)  |
| C(32)-Fe(1)-C(2)  | 102.37(9)  |
| C(31)-Fe(1)-C(2)  | 119.37(9)  |
| C(1)-Fe(1)-C(2)   | 40.49(9)   |
| C(33)-Fe(1)-C(2)  | 119.06(9)  |
| C(5)-Fe(1)-C(2)   | 69.35(9)   |
| C(32)-Fe(1)-C(35) | 69.08(9)   |

|                   |            |
|-------------------|------------|
| C(31)-Fe(1)-C(35) | 40.99(10)  |
| C(1)-Fe(1)-C(35)  | 161.38(10) |
| C(33)-Fe(1)-C(35) | 68.67(9)   |
| C(5)-Fe(1)-C(35)  | 125.19(9)  |
| C(2)-Fe(1)-C(35)  | 157.81(10) |
| C(32)-Fe(1)-C(34) | 68.81(9)   |
| C(31)-Fe(1)-C(34) | 68.64(9)   |
| C(1)-Fe(1)-C(34)  | 124.49(9)  |
| C(33)-Fe(1)-C(34) | 40.64(9)   |
| C(5)-Fe(1)-C(34)  | 111.32(9)  |
| C(2)-Fe(1)-C(34)  | 157.08(10) |
| C(35)-Fe(1)-C(34) | 40.50(9)   |
| C(32)-Fe(1)-C(4)  | 154.81(10) |
| C(31)-Fe(1)-C(4)  | 121.34(9)  |
| C(1)-Fe(1)-C(4)   | 68.97(9)   |
| C(33)-Fe(1)-C(4)  | 163.66(10) |
| C(5)-Fe(1)-C(4)   | 41.03(9)   |
| C(2)-Fe(1)-C(4)   | 68.62(9)   |
| C(35)-Fe(1)-C(4)  | 110.05(9)  |
| C(34)-Fe(1)-C(4)  | 127.90(10) |
| C(32)-Fe(1)-C(3)  | 118.07(10) |
| C(31)-Fe(1)-C(3)  | 105.27(9)  |
| C(1)-Fe(1)-C(3)   | 67.64(9)   |
| C(33)-Fe(1)-C(3)  | 154.22(10) |
| C(5)-Fe(1)-C(3)   | 68.25(9)   |
| C(2)-Fe(1)-C(3)   | 40.24(9)   |
| C(35)-Fe(1)-C(3)  | 124.44(9)  |
| C(34)-Fe(1)-C(3)  | 162.59(10) |
| C(4)-Fe(1)-C(3)   | 40.23(9)   |
| C(8)-N(1)-C(1)    | 116.76(19) |
| C(8)-N(1)-C(9)    | 122.63(19) |
| C(1)-N(1)-C(9)    | 120.57(19) |
| C(6)-N(2)-C(18)   | 126.1(2)   |
| C(6)-N(2)-C(21)   | 122.8(2)   |
| C(18)-N(2)-C(21)  | 110.70(19) |
| C(2)-C(1)-N(1)    | 130.8(2)   |

|                   |            |
|-------------------|------------|
| C(2)-C(1)-C(5)    | 108.54(19) |
| N(1)-C(1)-C(5)    | 120.7(2)   |
| C(2)-C(1)-Fe(1)   | 70.22(12)  |
| N(1)-C(1)-Fe(1)   | 126.94(15) |
| C(5)-C(1)-Fe(1)   | 69.35(11)  |
| C(3)-C(2)-C(1)    | 107.5(2)   |
| C(3)-C(2)-Fe(1)   | 70.28(13)  |
| C(1)-C(2)-Fe(1)   | 69.29(12)  |
| C(2)-C(3)-C(4)    | 109.8(2)   |
| C(2)-C(3)-Fe(1)   | 69.48(13)  |
| C(4)-C(3)-Fe(1)   | 69.78(13)  |
| C(3)-C(4)-C(5)    | 107.6(2)   |
| C(3)-C(4)-Fe(1)   | 69.98(13)  |
| C(5)-C(4)-Fe(1)   | 68.97(12)  |
| C(4)-C(5)-C(6)    | 133.6(2)   |
| C(4)-C(5)-C(1)    | 106.61(19) |
| C(6)-C(5)-C(1)    | 119.8(2)   |
| C(4)-C(5)-Fe(1)   | 70.00(12)  |
| C(6)-C(5)-Fe(1)   | 123.94(15) |
| C(1)-C(5)-Fe(1)   | 68.90(11)  |
| N(2)-C(6)-C(7)    | 120.7(2)   |
| N(2)-C(6)-C(5)    | 124.3(2)   |
| C(7)-C(6)-C(5)    | 115.0(2)   |
| C(8)-C(7)-C(6)    | 122.7(2)   |
| C(7)-C(8)-N(1)    | 124.7(2)   |
| O(1)-C(9)-N(1)    | 119.2(2)   |
| O(1)-C(9)-C(10)   | 122.0(2)   |
| N(1)-C(9)-C(10)   | 118.8(2)   |
| C(11)-C(10)-C(9)  | 117.9(2)   |
| C(10)-C(11)-C(12) | 128.3(2)   |
| C(17)-C(12)-C(13) | 118.8(2)   |
| C(17)-C(12)-C(11) | 118.5(2)   |
| C(13)-C(12)-C(11) | 122.7(2)   |
| C(14)-C(13)-C(12) | 119.9(2)   |
| C(15)-C(14)-C(13) | 120.6(3)   |
| C(16)-C(15)-C(14) | 120.1(3)   |

|                    |            |
|--------------------|------------|
| C(15)-C(16)-C(17)  | 119.4(3)   |
| C(16)-C(17)-C(12)  | 121.2(2)   |
| N(2)-C(18)-C(19)   | 102.7(2)   |
| C(20)-C(19)-C(18)  | 103.0(2)   |
| C(21)-C(20)-C(19)  | 103.1(2)   |
| N(2)-C(21)-C(20)   | 104.1(2)   |
| C(32)-C(31)-C(35)  | 108.2(2)   |
| C(32)-C(31)-C(310) | 126.1(2)   |
| C(35)-C(31)-C(310) | 125.7(2)   |
| C(32)-C(31)-Fe(1)  | 69.35(13)  |
| C(35)-C(31)-Fe(1)  | 70.38(12)  |
| C(310)-C(31)-Fe(1) | 126.17(16) |
| C(31)-C(32)-C(33)  | 107.7(2)   |
| C(31)-C(32)-C(320) | 126.5(2)   |
| C(33)-C(32)-C(320) | 125.8(2)   |
| C(31)-C(32)-Fe(1)  | 69.45(13)  |
| C(33)-C(32)-Fe(1)  | 69.81(12)  |
| C(320)-C(32)-Fe(1) | 127.00(16) |
| C(34)-C(33)-C(32)  | 107.9(2)   |
| C(34)-C(33)-C(330) | 125.6(2)   |
| C(32)-C(33)-C(330) | 126.5(2)   |
| C(34)-C(33)-Fe(1)  | 70.22(12)  |
| C(32)-C(33)-Fe(1)  | 68.98(13)  |
| C(330)-C(33)-Fe(1) | 127.69(16) |
| C(35)-C(34)-C(33)  | 108.6(2)   |
| C(35)-C(34)-C(340) | 126.4(2)   |
| C(33)-C(34)-C(340) | 125.0(2)   |
| C(35)-C(34)-Fe(1)  | 69.73(12)  |
| C(33)-C(34)-Fe(1)  | 69.14(12)  |
| C(340)-C(34)-Fe(1) | 128.33(15) |
| C(34)-C(35)-C(31)  | 107.7(2)   |
| C(34)-C(35)-C(350) | 126.2(2)   |
| C(31)-C(35)-C(350) | 126.0(2)   |
| C(34)-C(35)-Fe(1)  | 69.77(12)  |
| C(31)-C(35)-Fe(1)  | 68.62(12)  |
| C(350)-C(35)-Fe(1) | 129.88(16) |

|                |            |
|----------------|------------|
| F(2)-P(1)-F(5) | 91.85(10)  |
| F(2)-P(1)-F(4) | 90.81(11)  |
| F(5)-P(1)-F(4) | 90.68(10)  |
| F(2)-P(1)-F(3) | 90.74(10)  |
| F(5)-P(1)-F(3) | 90.12(10)  |
| F(4)-P(1)-F(3) | 178.23(11) |
| F(2)-P(1)-F(1) | 177.55(10) |
| F(5)-P(1)-F(1) | 90.58(10)  |
| F(4)-P(1)-F(1) | 89.51(12)  |
| F(3)-P(1)-F(1) | 88.91(11)  |
| F(2)-P(1)-F(6) | 89.38(9)   |
| F(5)-P(1)-F(6) | 178.75(10) |
| F(4)-P(1)-F(6) | 89.50(9)   |
| F(3)-P(1)-F(6) | 89.67(9)   |
| F(1)-P(1)-F(6) | 88.18(9)   |

---

Symmetry transformations used to generate equivalent atoms:

Table 4. Anisotropic displacement parameters ( $\text{\AA}^2 \times 10^3$ ) for 05261. The anisotropic displacement factor exponent takes the form:  $-2\pi^2 [ h^2 a^{*2} U^{11} + \dots + 2 h k a^* b^* U^{12} ]$

|        | U <sup>11</sup> | U <sup>22</sup> | U <sup>33</sup> | U <sup>23</sup> | U <sup>13</sup> | U <sup>12</sup> |
|--------|-----------------|-----------------|-----------------|-----------------|-----------------|-----------------|
| Fe(1)  | 13(1)           | 15(1)           | 13(1)           | 0(1)            | 0(1)            | 0(1)            |
| O(1)   | 22(1)           | 17(1)           | 41(1)           | -1(1)           | -3(1)           | -1(1)           |
| N(1)   | 13(1)           | 17(1)           | 18(1)           | -1(1)           | -3(1)           | 0(1)            |
| N(2)   | 23(1)           | 17(1)           | 18(1)           | 3(1)            | 5(1)            | 0(1)            |
| C(1)   | 17(1)           | 17(1)           | 14(1)           | 1(1)            | 0(1)            | -1(1)           |
| C(2)   | 17(1)           | 18(1)           | 17(1)           | -2(1)           | 0(1)            | 5(1)            |
| C(3)   | 15(1)           | 20(1)           | 17(1)           | -3(1)           | 0(1)            | 4(1)            |
| C(4)   | 14(1)           | 23(1)           | 17(1)           | 2(1)            | 2(1)            | -3(1)           |
| C(5)   | 17(1)           | 17(1)           | 13(1)           | 1(1)            | 1(1)            | -3(1)           |
| C(6)   | 19(1)           | 19(1)           | 14(1)           | 3(1)            | 3(1)            | 1(1)            |
| C(7)   | 17(1)           | 20(1)           | 21(1)           | 3(1)            | 0(1)            | 2(1)            |
| C(8)   | 15(1)           | 23(1)           | 18(1)           | 3(1)            | -2(1)           | 0(1)            |
| C(9)   | 21(1)           | 17(1)           | 17(1)           | 0(1)            | -2(1)           | -2(1)           |
| C(10)  | 21(1)           | 20(1)           | 18(1)           | -1(1)           | -2(1)           | -1(1)           |
| C(11)  | 19(1)           | 22(1)           | 19(1)           | 1(1)            | -3(1)           | 1(1)            |
| C(12)  | 25(1)           | 24(1)           | 13(1)           | 2(1)            | -4(1)           | -7(1)           |
| C(13)  | 28(1)           | 22(1)           | 27(1)           | 5(1)            | -3(1)           | -3(1)           |
| C(14)  | 22(1)           | 36(2)           | 38(2)           | 7(1)            | -2(1)           | -2(1)           |
| C(15)  | 26(1)           | 49(2)           | 28(1)           | 1(1)            | 0(1)            | -20(1)          |
| C(16)  | 41(2)           | 29(1)           | 22(1)           | -1(1)           | 1(1)            | -16(1)          |
| C(17)  | 32(2)           | 23(1)           | 20(1)           | 1(1)            | 0(1)            | -5(1)           |
| C(18)  | 23(1)           | 21(1)           | 30(1)           | 0(1)            | 6(1)            | -5(1)           |
| C(19)  | 36(2)           | 25(1)           | 47(2)           | -10(1)          | 10(1)           | -7(1)           |
| C(20)  | 39(2)           | 17(1)           | 46(2)           | 2(1)            | 18(1)           | 1(1)            |
| C(21)  | 29(1)           | 18(1)           | 32(1)           | 4(1)            | 8(1)            | 5(1)            |
| C(31)  | 19(1)           | 23(1)           | 15(1)           | 3(1)            | -2(1)           | -2(1)           |
| C(32)  | 19(1)           | 23(1)           | 16(1)           | 3(1)            | -1(1)           | -1(1)           |
| C(33)  | 20(1)           | 21(1)           | 14(1)           | 1(1)            | 0(1)            | 0(1)            |
| C(34)  | 19(1)           | 21(1)           | 14(1)           | 1(1)            | 1(1)            | 1(1)            |
| C(35)  | 20(1)           | 22(1)           | 14(1)           | -2(1)           | -1(1)           | -2(1)           |
| C(310) | 21(1)           | 26(1)           | 23(1)           | 3(1)            | -5(1)           | 0(1)            |

|        |       |       |       |        |       |        |
|--------|-------|-------|-------|--------|-------|--------|
| C(320) | 26(1) | 22(1) | 26(1) | 4(1)   | -2(1) | -1(1)  |
| C(330) | 20(1) | 29(1) | 22(1) | 1(1)   | 2(1)  | -6(1)  |
| C(340) | 25(1) | 23(1) | 21(1) | -3(1)  | 3(1)  | 5(1)   |
| C(350) | 26(1) | 24(1) | 23(1) | -5(1)  | -2(1) | -6(1)  |
| P(1)   | 18(1) | 24(1) | 33(1) | -2(1)  | 5(1)  | 1(1)   |
| F(1)   | 43(1) | 30(1) | 73(1) | -13(1) | 22(1) | -12(1) |
| F(2)   | 42(1) | 45(1) | 51(1) | -17(1) | -2(1) | -13(1) |
| F(3)   | 29(1) | 40(1) | 58(1) | -3(1)  | -8(1) | 11(1)  |
| F(4)   | 46(1) | 74(1) | 37(1) | 22(1)  | 12(1) | 25(1)  |
| F(5)   | 37(1) | 51(1) | 50(1) | -9(1)  | 23(1) | 3(1)   |
| F(6)   | 23(1) | 36(1) | 30(1) | 3(1)   | 3(1)  | 0(1)   |

---



Table 5. Hydrogen coordinates ( $\times 10^4$ ) and isotropic displacement parameters ( $\text{\AA}^2 \times 10^3$ ) for 05261.

|        | x     | y     | z    | U(eq) |
|--------|-------|-------|------|-------|
| H(2)   | 312   | 7989  | 439  | 21    |
| H(3)   | 2030  | 9206  | 461  | 21    |
| H(4)   | 1452  | 11232 | 442  | 22    |
| H(7)   | -2721 | 11759 | 305  | 23    |
| H(8)   | -3242 | 9964  | 286  | 22    |
| H(10)  | -3879 | 8502  | 427  | 23    |
| H(11)  | -3139 | 6300  | 387  | 24    |
| H(13)  | -5685 | 7914  | 430  | 31    |
| H(14)  | -7480 | 7158  | 409  | 38    |
| H(15)  | -7734 | 5233  | 372  | 41    |
| H(16)  | -6194 | 4041  | 388  | 37    |
| H(17)  | -4396 | 4792  | 407  | 30    |
| H(18A) | 821   | 13138 | 331  | 30    |
| H(18B) | 679   | 12585 | 692  | 30    |
| H(19A) | -225  | 14141 | 899  | 43    |
| H(19B) | 648   | 14729 | 651  | 43    |
| H(20A) | -1402 | 15164 | 556  | 41    |
| H(20B) | -678  | 14865 | 233  | 41    |
| H(21A) | -2197 | 13434 | 576  | 31    |
| H(21B) | -2000 | 13503 | 183  | 31    |
| H(31A) | 2462  | 8889  | 1491 | 35    |
| H(31B) | 2764  | 9739  | 1200 | 35    |
| H(31C) | 2405  | 8485  | 1115 | 35    |
| H(32A) | 67    | 7187  | 1420 | 37    |
| H(32B) | 875   | 7251  | 1106 | 37    |
| H(32C) | -450  | 7235  | 1056 | 37    |
| H(33A) | -2045 | 8305  | 1076 | 35    |
| H(33B) | -2465 | 9570  | 1053 | 35    |
| H(33C) | -2348 | 8977  | 1406 | 35    |
| H(34A) | -1539 | 11665 | 1477 | 34    |

|        |       |       |      |    |
|--------|-------|-------|------|----|
| H(34B) | -1918 | 11421 | 1105 | 34 |
| H(34C) | -881  | 12227 | 1176 | 34 |
| H(35A) | 1012  | 12274 | 1221 | 36 |
| H(35B) | 2116  | 11522 | 1209 | 36 |
| H(35C) | 1497  | 11740 | 1554 | 36 |

---

# Structural Data

Date: December 15, 2005

Submitter: Erhard Bappert

Sample Reference Number:

X-ray Number: gf106

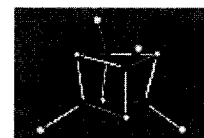

X-ray Crystallographic Laboratory  
Harvard University  
Cambridge MA, 02138  
**Dr. Richard J. Staples**  
staples@chemistry.harvard.edu

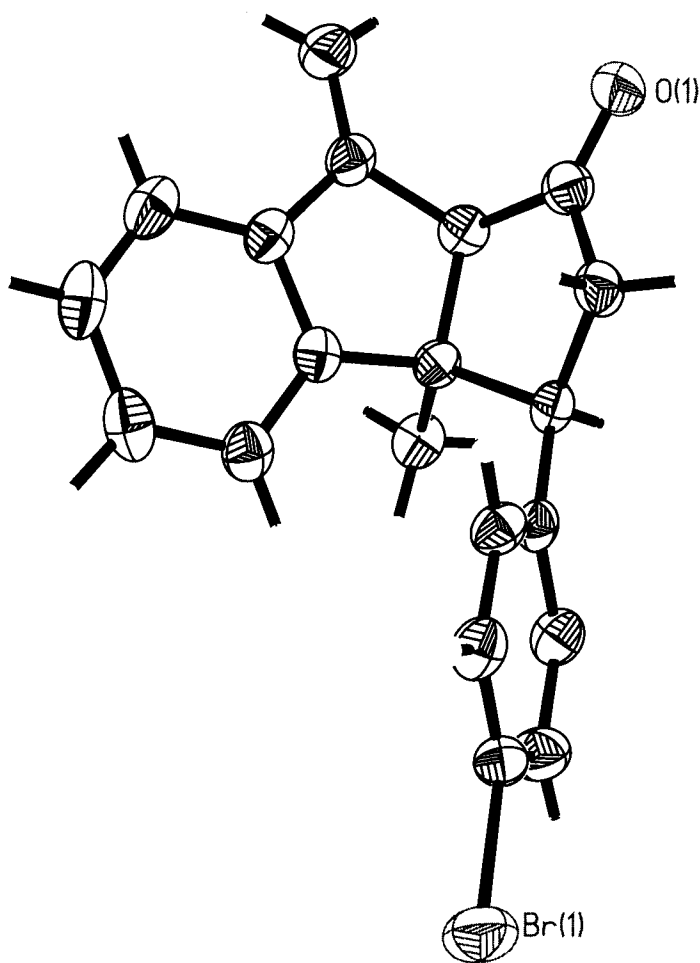

## Introduction:

Single crystal study to confirm the identity of the sample submitted. Chirality was determined.

## Experimental Section:

A colorless block crystal with dimensions 0.12 x 0.10 x 0.10 mm was mounted on a glass fiber using very small amount of paratone oil.

Data were collected using a Bruker SMART CCD (charge coupled device) based diffractometer equipped with an Oxford Cryostream low-temperature apparatus operating at 193 K. Data were measured using omega scans of 0.3 ° per frame for 30 seconds, such that a hemisphere was collected. A total of 1271 frames were collected with a maximum resolution of 0.76 Å. The first 50 frames were recollected at the end of data collection to monitor for decay. Cell parameters were retrieved using SMART<sup>1</sup> software and refined using SAINT on all observed reflections. Data reduction was performed using the SAINT software<sup>2</sup> which corrects for Lp and decay. Absorption corrections were applied using SADABS<sup>6</sup> multiscan technique, supplied by George Sheldrick. The structures are solved by the direct method using the SHELXS-97<sup>3</sup> program and refined by least squares method on F<sup>2</sup>, SHELXL-97,<sup>4</sup> incorporated in SHELXTL-PC V 6.10.<sup>5</sup>

The structure was solved in the space group P2<sub>1</sub>2<sub>1</sub>2<sub>1</sub> (# 19) by analysis of systematic absences. All non-hydrogen atoms are refined anisotropically. Hydrogens were found by difference fourier methods and refined isotropically. The Flack<sup>7</sup> parameter is used to determine chirality of the crystal studied, the value should be near zero, a value of one is the other enantiomer and a value of 0.5 is racemic. The Flack parameter was refined to 0.015(9), confirming the absolute stereochemistry. The crystal used for the diffraction study showed no decomposition during data collection. All drawing are done at 50% ellipsoids.

**Acknowledgement.** The CCD based x-ray diffractometer at Harvard University was purchased through NIH grant (1S10RR11937-01).

## References

1. SMART V 5.625 (NT) *Software for the CCD Detector System*; Bruker Analytical X-ray Systems, Madison, WI (2001).
2. SAINT V 6.22 (NT) *Software for the CCD Detector System* Bruker Analytical X-ray Systems, Madison, WI (2001).
3. Sheldrick, G. M. SHELXS-90, *Program for the Solution of Crystal Structure*, University of Göttingen, Germany, 1990.
4. Sheldrick, G. M. SHELXL-97, *Program for the Refinement of Crystal Structure*, University of Göttingen, Germany, 1997.
5. SHELXTL 6.1 (PC-Version), *Program library for Structure Solution and Molecular Graphics*; Bruker Analytical X-ray Systems, Madison, WI (2000).
6. SADABS. Program for absorption corrections using Siemens CCD based on the method of Robert Blessing; Blessing, R.H. *Acta Cryst. A51* **1995**, 33-38.
7. Flack, H. D.. *Acta Cryst. A39*, **1983**, 876-881.

<sup>a</sup> Obtained with graphite monochromated Mo K $\alpha$  ( $\lambda = 0.71073$  Å) radiation.

$$^b R_1 = \frac{\sum ||F_o| - |F_c||}{\sum |F_o|} \quad ^c wR_2 = \left\{ \frac{\sum [w(F_o^2 - F_c^2)]^2}{\sum [w(F_o^2)]^2} \right\}^{1/2}$$

The following are 50% thermal ellipsoidal drawings of the molecule in the asymmetric cell with various amount of labeling.

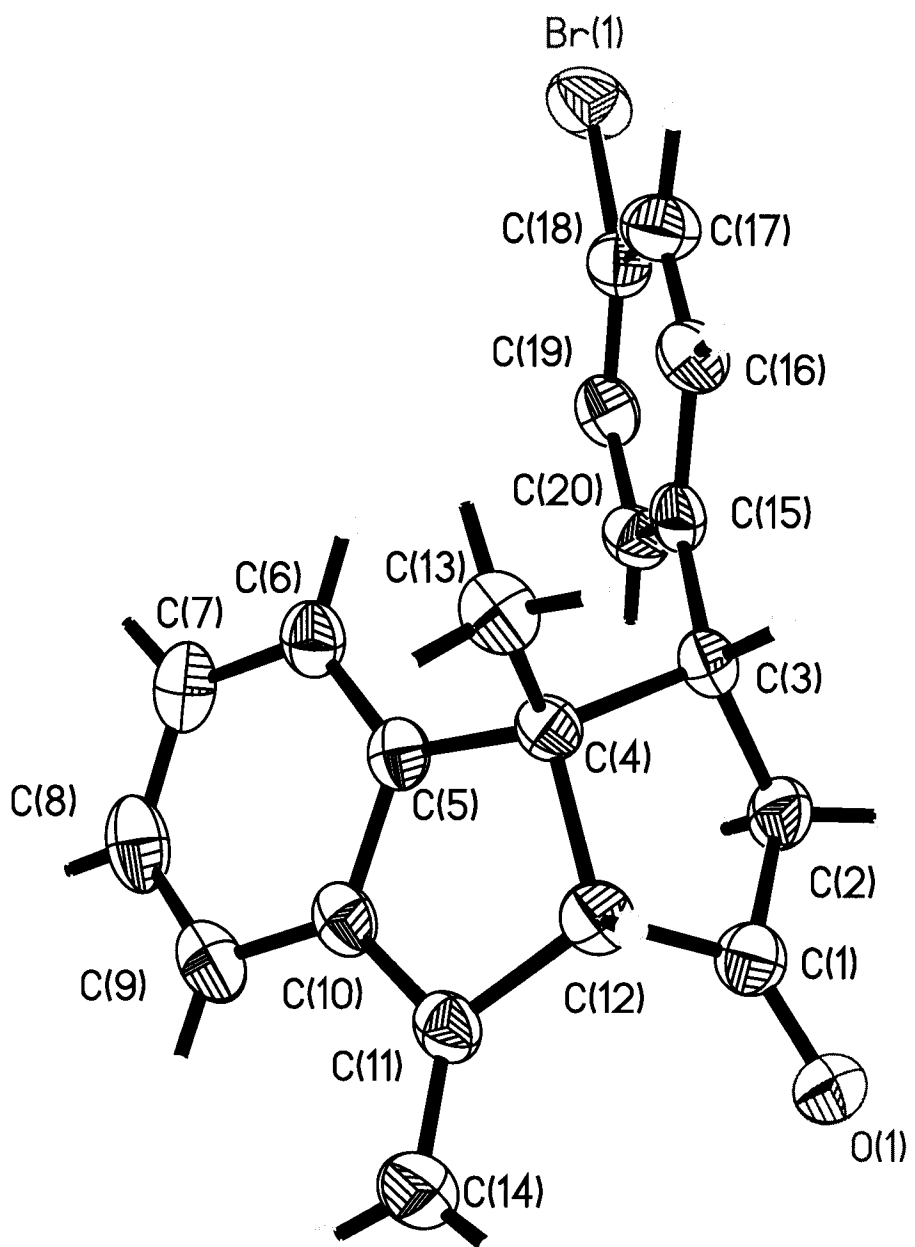

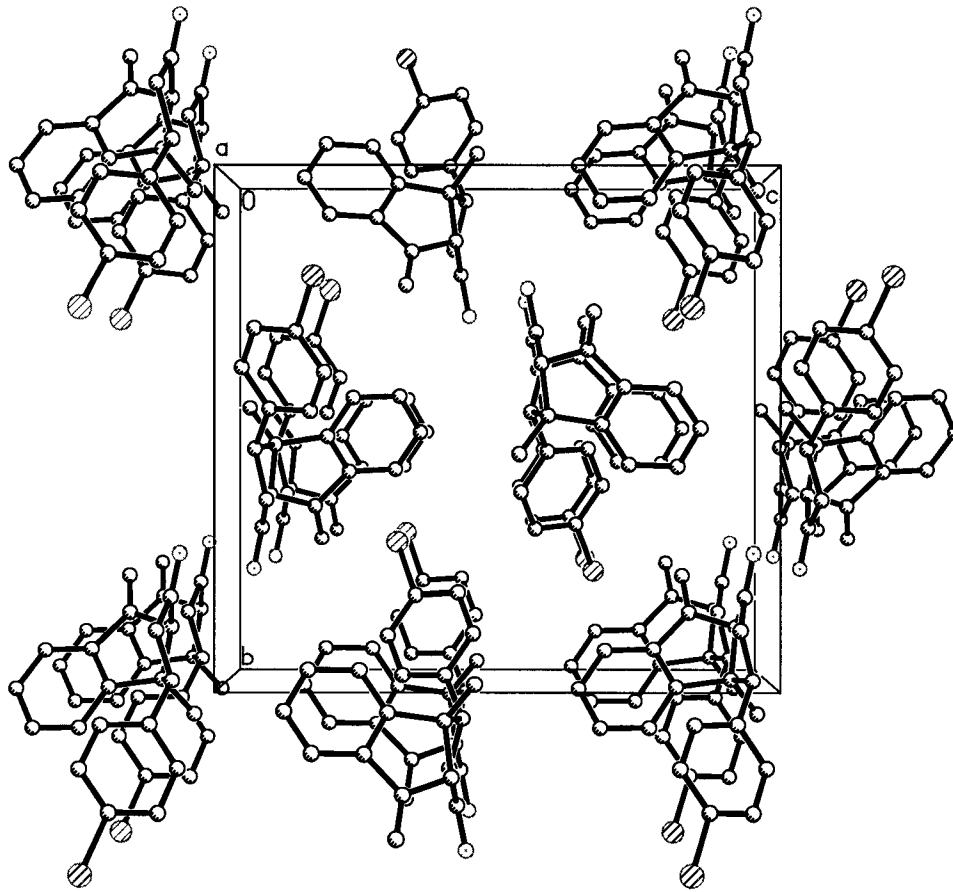

This is a drawing of the packing along the a-axis.

Table 1. Crystal data and structure refinement for gf106t.

|                                   |                                             |          |
|-----------------------------------|---------------------------------------------|----------|
| Identification code               | gf106t                                      |          |
| Empirical formula                 | C <sub>20</sub> H <sub>17</sub> Br O        |          |
| Formula weight                    | 353.25                                      |          |
| Temperature                       | 193(2) K                                    |          |
| Wavelength                        | 0.71073 Å                                   |          |
| Crystal system                    | Orthorhombic                                |          |
| Space group                       | P2(1)2(1)2(1)                               |          |
| Unit cell dimensions              | a = 7.2277(14) Å                            | α = 90°. |
|                                   | b = 14.583(3) Å                             | β = 90°. |
|                                   | c = 15.656(3) Å                             | γ = 90°. |
| Volume                            | 1650.2(5) Å <sup>3</sup>                    |          |
| Z                                 | 4                                           |          |
| Density (calculated)              | 1.422 Mg/m <sup>3</sup>                     |          |
| Absorption coefficient            | 2.490 mm <sup>-1</sup>                      |          |
| F(000)                            | 720                                         |          |
| Crystal size                      | 0.20 x 0.12 x 0.10 mm <sup>3</sup>          |          |
| Theta range for data collection   | 1.91 to 27.88°.                             |          |
| Index ranges                      | -9 ≤ h ≤ 9, -18 ≤ k ≤ 18, -20 ≤ l ≤ 12      |          |
| Reflections collected             | 9518                                        |          |
| Independent reflections           | 3593 [R(int) = 0.0238]                      |          |
| Completeness to theta = 27.88°    | 94.0 %                                      |          |
| Absorption correction             | Empirical                                   |          |
| Max. and min. transmission        | 0.7888 and 0.6358                           |          |
| Refinement method                 | Full-matrix least-squares on F <sup>2</sup> |          |
| Data / restraints / parameters    | 3593 / 0 / 267                              |          |
| Goodness-of-fit on F <sup>2</sup> | 0.971                                       |          |
| Final R indices [I > 2σ(I)]       | R1 = 0.0328, wR2 = 0.0694                   |          |
| R indices (all data)              | R1 = 0.0437, wR2 = 0.0728                   |          |
| Absolute structure parameter      | 0.015(9)                                    |          |
| Largest diff. peak and hole       | 0.492 and -0.365 e.Å <sup>-3</sup>          |          |



Table 2. Atomic coordinates ( $\times 10^4$ ) and equivalent isotropic displacement parameters ( $\text{\AA}^2 \times 10^3$ ) for gf106t.  $U(\text{eq})$  is defined as one third of the trace of the orthogonalized  $U^{\text{ij}}$  tensor.

|       | x        | y        | z       | U(eq) |
|-------|----------|----------|---------|-------|
| Br(1) | 7460(1)  | 2843(1)  | 8184(1) | 53(1) |
| O(1)  | 1265(3)  | -2701(1) | 9463(1) | 44(1) |
| C(1)  | 1321(4)  | -1890(2) | 9310(2) | 35(1) |
| C(2)  | 3044(4)  | -1329(2) | 9164(2) | 35(1) |
| C(3)  | 2457(4)  | -354(2)  | 9395(2) | 29(1) |
| C(4)  | 386(3)   | -280(2)  | 9106(2) | 28(1) |
| C(5)  | 101(3)   | -120(2)  | 8152(2) | 28(1) |
| C(6)  | 597(3)   | 642(2)   | 7666(2) | 35(1) |
| C(7)  | 112(4)   | 673(2)   | 6815(2) | 42(1) |
| C(8)  | -865(4)  | -39(2)   | 6447(2) | 44(1) |
| C(9)  | -1422(4) | -776(2)  | 6921(2) | 41(1) |
| C(10) | -939(3)  | -818(2)  | 7781(2) | 30(1) |
| C(11) | -1452(3) | -1508(2) | 8430(2) | 33(1) |
| C(12) | -378(4)  | -1270(2) | 9226(2) | 31(1) |
| C(13) | -656(4)  | 441(2)   | 9618(2) | 36(1) |
| C(14) | -2643(4) | -2192(2) | 8344(2) | 44(1) |
| C(15) | 3713(3)  | 408(2)   | 9086(2) | 29(1) |
| C(16) | 3889(4)  | 1204(2)  | 9570(2) | 35(1) |
| C(17) | 4961(4)  | 1941(2)  | 9300(2) | 41(1) |
| C(18) | 5898(3)  | 1863(2)  | 8537(2) | 35(1) |
| C(19) | 5791(3)  | 1090(2)  | 8045(2) | 34(1) |
| C(20) | 4695(3)  | 362(2)   | 8324(2) | 32(1) |

Table 3. Bond lengths [Å] and angles [°] for gf106t.

|                  |            |                 |           |
|------------------|------------|-----------------|-----------|
| Br(1)-C(18)      | 1.903(2)   | O(1)-C(1)       | 1.208(3)  |
| C(1)-C(2)        | 1.507(4)   | C(1)-C(12)      | 1.531(4)  |
| C(2)-C(3)        | 1.527(3)   | C(2)-H(2)       | 0.92(3)   |
| C(2)-H(1)        | 1.02(3)    | C(3)-C(15)      | 1.514(4)  |
| C(3)-C(4)        | 1.567(4)   | C(3)-H(3)       | 0.96(2)   |
| C(4)-C(13)       | 1.521(4)   | C(4)-C(5)       | 1.526(4)  |
| C(4)-C(12)       | 1.556(3)   | C(5)-C(10)      | 1.392(3)  |
| C(5)-C(6)        | 1.394(4)   | C(6)-C(7)       | 1.378(4)  |
| C(6)-H(4)        | 0.97(3)    | C(7)-C(8)       | 1.381(5)  |
| C(7)-H(5)        | 1.03(3)    | C(8)-C(9)       | 1.367(4)  |
| C(8)-H(6)        | 0.94(3)    | C(9)-C(10)      | 1.392(4)  |
| C(9)-H(7)        | 0.93(3)    | C(10)-C(11)     | 1.477(4)  |
| C(11)-C(14)      | 1.324(4)   | C(11)-C(12)     | 1.510(4)  |
| C(12)-H(8)       | 0.87(3)    | C(13)-H(10)     | 1.02(3)   |
| C(13)-H(9)       | 0.91(3)    | C(13)-H(11)     | 0.95(3)   |
| C(14)-H(12)      | 0.91(3)    | C(14)-H(13)     | 0.90(3)   |
| C(15)-C(20)      | 1.390(4)   | C(15)-C(16)     | 1.393(4)  |
| C(16)-C(17)      | 1.390(4)   | C(16)-H(14)     | 0.91(3)   |
| C(17)-C(18)      | 1.379(4)   | C(17)-H(15)     | 0.95(3)   |
| C(18)-C(19)      | 1.368(4)   | C(19)-C(20)     | 1.394(4)  |
| C(19)-H(16)      | 0.89(3)    | C(20)-H(17)     | 0.91(3)   |
| O(1)-C(1)-C(2)   | 126.1(3)   | O(1)-C(1)-C(12) | 124.7(3)  |
| C(2)-C(1)-C(12)  | 109.2(2)   | C(1)-C(2)-C(3)  | 103.9(2)  |
| C(1)-C(2)-H(2)   | 106.8(17)  | C(3)-C(2)-H(2)  | 119.8(17) |
| C(1)-C(2)-H(1)   | 110.7(18)  | C(3)-C(2)-H(1)  | 109.8(17) |
| H(2)-C(2)-H(1)   | 106(3)     | C(15)-C(3)-C(2) | 116.2(2)  |
| C(15)-C(3)-C(4)  | 115.4(2)   | C(2)-C(3)-C(4)  | 105.1(2)  |
| C(15)-C(3)-H(3)  | 107.5(14)  | C(2)-C(3)-H(3)  | 109.3(13) |
| C(4)-C(3)-H(3)   | 102.4(17)  | C(13)-C(4)-C(5) | 110.1(2)  |
| C(13)-C(4)-C(12) | 113.7(2)   | C(5)-C(4)-C(12) | 102.3(2)  |
| C(13)-C(4)-C(3)  | 111.6(2)   | C(5)-C(4)-C(3)  | 115.0(2)  |
| C(12)-C(4)-C(3)  | 103.90(19) | C(10)-C(5)-C(6) | 119.6(3)  |
| C(10)-C(5)-C(4)  | 111.7(2)   | C(6)-C(5)-C(4)  | 128.5(2)  |

|                   |           |                   |           |
|-------------------|-----------|-------------------|-----------|
| C(7)-C(6)-C(5)    | 119.3(3)  | C(7)-C(6)-H(4)    | 121.1(16) |
| C(5)-C(6)-H(4)    | 119.6(16) | C(6)-C(7)-C(8)    | 120.6(3)  |
| C(6)-C(7)-H(5)    | 123.8(17) | C(8)-C(7)-H(5)    | 115.7(16) |
| C(9)-C(8)-C(7)    | 121.0(3)  | C(9)-C(8)-H(6)    | 118.9(18) |
| C(7)-C(8)-H(6)    | 120.1(18) | C(8)-C(9)-C(10)   | 119.1(3)  |
| C(8)-C(9)-H(7)    | 120.6(16) | C(10)-C(9)-H(7)   | 120.2(16) |
| C(9)-C(10)-C(5)   | 120.4(3)  | C(9)-C(10)-C(11)  | 129.2(2)  |
| C(5)-C(10)-C(11)  | 110.3(2)  | C(14)-C(11)-C(10) | 127.4(3)  |
| C(14)-C(11)-C(12) | 126.3(3)  | C(10)-C(11)-C(12) | 106.4(2)  |
| C(11)-C(12)-C(1)  | 110.3(2)  | C(11)-C(12)-C(4)  | 107.2(2)  |
| C(1)-C(12)-C(4)   | 105.9(2)  | C(11)-C(12)-H(8)  | 114.6(16) |
| C(1)-C(12)-H(8)   | 107.6(16) | C(4)-C(12)-H(8)   | 110.9(16) |
| C(4)-C(13)-H(10)  | 111.5(18) | C(4)-C(13)-H(9)   | 109.9(16) |
| H(10)-C(13)-H(9)  | 107(2)    | C(4)-C(13)-H(11)  | 108.5(17) |
| H(10)-C(13)-H(11) | 110(2)    | H(9)-C(13)-H(11)  | 110(2)    |
| C(11)-C(14)-H(12) | 117.3(19) | C(11)-C(14)-H(13) | 119.4(16) |
| H(12)-C(14)-H(13) | 123(2)    | C(20)-C(15)-C(16) | 117.4(2)  |
| C(20)-C(15)-C(3)  | 123.1(2)  | C(16)-C(15)-C(3)  | 119.5(2)  |
| C(17)-C(16)-C(15) | 122.0(3)  | C(17)-C(16)-H(14) | 119.9(16) |
| C(15)-C(16)-H(14) | 117.9(16) | C(18)-C(17)-C(16) | 118.3(3)  |
| C(18)-C(17)-H(15) | 121.0(17) | C(16)-C(17)-H(15) | 120.6(17) |
| C(19)-C(18)-C(17) | 121.9(2)  | C(19)-C(18)-Br(1) | 119.3(2)  |
| C(17)-C(18)-Br(1) | 118.8(2)  | C(18)-C(19)-C(20) | 118.9(3)  |
| C(18)-C(19)-H(16) | 121.4(18) | C(20)-C(19)-H(16) | 119.7(18) |
| C(15)-C(20)-C(19) | 121.5(3)  | C(15)-C(20)-H(17) | 120.7(15) |
| C(19)-C(20)-H(17) | 117.8(15) |                   |           |

---

Symmetry transformations used to generate equivalent atoms:

Table 4. Anisotropic displacement parameters ( $\text{\AA}^2 \times 10^3$ ) for gf106t. The anisotropic displacement factor exponent takes the form:  $-2\pi^2 [h^2 a^{*2} U^{11} + \dots + 2 h k a^* b^* U^{12}]$

|       | $U^{11}$ | $U^{22}$ | $U^{33}$ | $U^{23}$ | $U^{13}$ | $U^{12}$ |
|-------|----------|----------|----------|----------|----------|----------|
| Br(1) | 61(1)    | 50(1)    | 47(1)    | 5(1)     | -3(1)    | -26(1)   |
| O(1)  | 44(1)    | 34(1)    | 53(1)    | 10(1)    | -11(1)   | -7(1)    |
| C(1)  | 40(1)    | 37(2)    | 29(1)    | 3(1)     | -1(1)    | -4(1)    |
| C(2)  | 27(1)    | 34(1)    | 44(2)    | 4(1)     | -4(1)    | 3(1)     |
| C(3)  | 26(1)    | 35(1)    | 24(1)    | 1(1)     | -3(1)    | -1(1)    |
| C(4)  | 24(1)    | 31(1)    | 29(1)    | -1(1)    | 1(1)     | -1(1)    |
| C(5)  | 22(1)    | 34(1)    | 29(1)    | -1(1)    | 2(1)     | 6(1)     |
| C(6)  | 25(1)    | 42(2)    | 38(2)    | 3(1)     | -1(1)    | 2(1)     |
| C(7)  | 32(1)    | 55(2)    | 38(2)    | 14(2)    | 2(2)     | 8(1)     |
| C(8)  | 40(2)    | 67(2)    | 25(2)    | 2(2)     | -3(1)    | 11(2)    |
| C(9)  | 32(1)    | 52(2)    | 38(2)    | -10(1)   | -6(1)    | 6(1)     |
| C(10) | 21(1)    | 38(2)    | 32(1)    | -5(1)    | 0(1)     | 5(1)     |
| C(11) | 24(1)    | 36(1)    | 39(2)    | -4(1)    | -4(1)    | 4(1)     |
| C(12) | 29(1)    | 36(2)    | 29(1)    | 2(1)     | 5(1)     | -4(1)    |
| C(13) | 31(2)    | 44(2)    | 32(2)    | -6(1)    | 4(1)     | 2(1)     |
| C(14) | 35(1)    | 42(1)    | 55(2)    | -2(2)    | -8(2)    | -4(1)    |
| C(15) | 21(1)    | 33(1)    | 32(1)    | 1(1)     | -6(1)    | 3(1)     |
| C(16) | 35(2)    | 42(2)    | 29(1)    | -3(1)    | 1(1)     | -1(1)    |
| C(17) | 47(2)    | 37(2)    | 40(2)    | -6(1)    | -1(1)    | -5(1)    |
| C(18) | 31(1)    | 35(1)    | 40(2)    | 7(1)     | -4(1)    | -9(1)    |
| C(19) | 25(1)    | 45(2)    | 34(2)    | 0(1)     | 1(1)     | -1(1)    |
| C(20) | 25(1)    | 34(1)    | 35(2)    | -7(1)    | -1(1)    | 0(1)     |

Table 5. Hydrogen coordinates ( $\times 10^4$ ) and isotropic displacement parameters ( $\text{\AA}^2 \times 10^3$ ) for gfl06t.

|       | x         | y         | z         | U(eq) |
|-------|-----------|-----------|-----------|-------|
| H(2)  | 3980(40)  | -1609(18) | 9463(19)  | 34(7) |
| H(1)  | 3430(40)  | -1350(20) | 8530(20)  | 56(9) |
| H(3)  | 2370(40)  | -301(14)  | 10002(15) | 21(5) |
| H(4)  | 1260(40)  | 1145(19)  | 7932(17)  | 38(8) |
| H(5)  | 410(40)   | 1220(20)  | 6419(19)  | 49(9) |
| H(6)  | -1130(40) | -30(18)   | 5860(20)  | 46(9) |
| H(7)  | -2100(40) | -1249(18) | 6672(16)  | 39(8) |
| H(8)  | -1010(30) | -1314(16) | 9698(17)  | 24(7) |
| H(10) | -160(40)  | 1090(20)  | 9500(20)  | 49(9) |
| H(9)  | -500(30)  | 336(16)   | 10186(18) | 21(6) |
| H(11) | -1930(40) | 406(18)   | 9472(18)  | 41(8) |
| H(12) | -3160(40) | -2280(20) | 7820(20)  | 44(8) |
| H(13) | -2860(40) | -2564(19) | 8792(17)  | 31(7) |
| H(14) | 3200(40)  | 1253(17)  | 10056(17) | 32(7) |
| H(15) | 5100(40)  | 2469(19)  | 9651(17)  | 43(8) |
| H(16) | 6400(40)  | 1043(18)  | 7553(17)  | 31(7) |
| H(17) | 4660(30)  | -152(17)  | 7994(16)  | 19(7) |

Table 6. Torsion angles [°] for gf106t.

---

|                        |           |
|------------------------|-----------|
| O(1)-C(1)-C(2)-C(3)    | -155.6(3) |
| C(12)-C(1)-C(2)-C(3)   | 24.9(3)   |
| C(1)-C(2)-C(3)-C(15)   | -163.7(2) |
| C(1)-C(2)-C(3)-C(4)    | -34.7(3)  |
| C(15)-C(3)-C(4)-C(13)  | -76.2(3)  |
| C(2)-C(3)-C(4)-C(13)   | 154.4(2)  |
| C(15)-C(3)-C(4)-C(5)   | 50.0(3)   |
| C(2)-C(3)-C(4)-C(5)    | -79.3(3)  |
| C(15)-C(3)-C(4)-C(12)  | 160.9(2)  |
| C(2)-C(3)-C(4)-C(12)   | 31.6(3)   |
| C(13)-C(4)-C(5)-C(10)  | -112.2(2) |
| C(12)-C(4)-C(5)-C(10)  | 8.8(3)    |
| C(3)-C(4)-C(5)-C(10)   | 120.7(2)  |
| C(13)-C(4)-C(5)-C(6)   | 61.7(3)   |
| C(12)-C(4)-C(5)-C(6)   | -177.3(2) |
| C(3)-C(4)-C(5)-C(6)    | -65.4(3)  |
| C(10)-C(5)-C(6)-C(7)   | -2.6(4)   |
| C(4)-C(5)-C(6)-C(7)    | -176.1(2) |
| C(5)-C(6)-C(7)-C(8)    | 0.4(4)    |
| C(6)-C(7)-C(8)-C(9)    | 2.1(4)    |
| C(7)-C(8)-C(9)-C(10)   | -2.2(4)   |
| C(8)-C(9)-C(10)-C(5)   | -0.1(4)   |
| C(8)-C(9)-C(10)-C(11)  | 176.4(3)  |
| C(6)-C(5)-C(10)-C(9)   | 2.5(3)    |
| C(4)-C(5)-C(10)-C(9)   | 177.1(2)  |
| C(6)-C(5)-C(10)-C(11)  | -174.6(2) |
| C(4)-C(5)-C(10)-C(11)  | -0.1(3)   |
| C(9)-C(10)-C(11)-C(14) | -7.2(4)   |
| C(5)-C(10)-C(11)-C(14) | 169.6(3)  |
| C(9)-C(10)-C(11)-C(12) | 174.0(2)  |
| C(5)-C(10)-C(11)-C(12) | -9.1(3)   |
| C(14)-C(11)-C(12)-C(1) | 80.8(3)   |
| C(10)-C(11)-C(12)-C(1) | -100.4(2) |
| C(14)-C(11)-C(12)-C(4) | -164.3(3) |

|                         |            |
|-------------------------|------------|
| C(10)-C(11)-C(12)-C(4)  | 14.5(3)    |
| O(1)-C(1)-C(12)-C(11)   | -69.0(4)   |
| C(2)-C(1)-C(12)-C(11)   | 110.5(3)   |
| O(1)-C(1)-C(12)-C(4)    | 175.3(3)   |
| C(2)-C(1)-C(12)-C(4)    | -5.2(3)    |
| C(13)-C(4)-C(12)-C(11)  | 104.6(3)   |
| C(5)-C(4)-C(12)-C(11)   | -14.0(2)   |
| C(3)-C(4)-C(12)-C(11)   | -133.9(2)  |
| C(13)-C(4)-C(12)-C(1)   | -137.6(2)  |
| C(5)-C(4)-C(12)-C(1)    | 103.8(2)   |
| C(3)-C(4)-C(12)-C(1)    | -16.1(3)   |
| C(2)-C(3)-C(15)-C(20)   | 33.1(3)    |
| C(4)-C(3)-C(15)-C(20)   | -90.7(3)   |
| C(2)-C(3)-C(15)-C(16)   | -148.1(2)  |
| C(4)-C(3)-C(15)-C(16)   | 88.2(3)    |
| C(20)-C(15)-C(16)-C(17) | 1.6(4)     |
| C(3)-C(15)-C(16)-C(17)  | -177.3(3)  |
| C(15)-C(16)-C(17)-C(18) | -1.3(4)    |
| C(16)-C(17)-C(18)-C(19) | 0.3(4)     |
| C(16)-C(17)-C(18)-Br(1) | -177.1(2)  |
| C(17)-C(18)-C(19)-C(20) | 0.3(4)     |
| Br(1)-C(18)-C(19)-C(20) | 177.68(19) |
| C(16)-C(15)-C(20)-C(19) | -1.1(4)    |
| C(3)-C(15)-C(20)-C(19)  | 177.8(2)   |
| C(18)-C(19)-C(20)-C(15) | 0.1(4)     |

---

Symmetry transformations used to generate equivalent atoms:

Table 1, entry 1

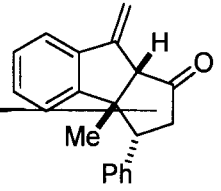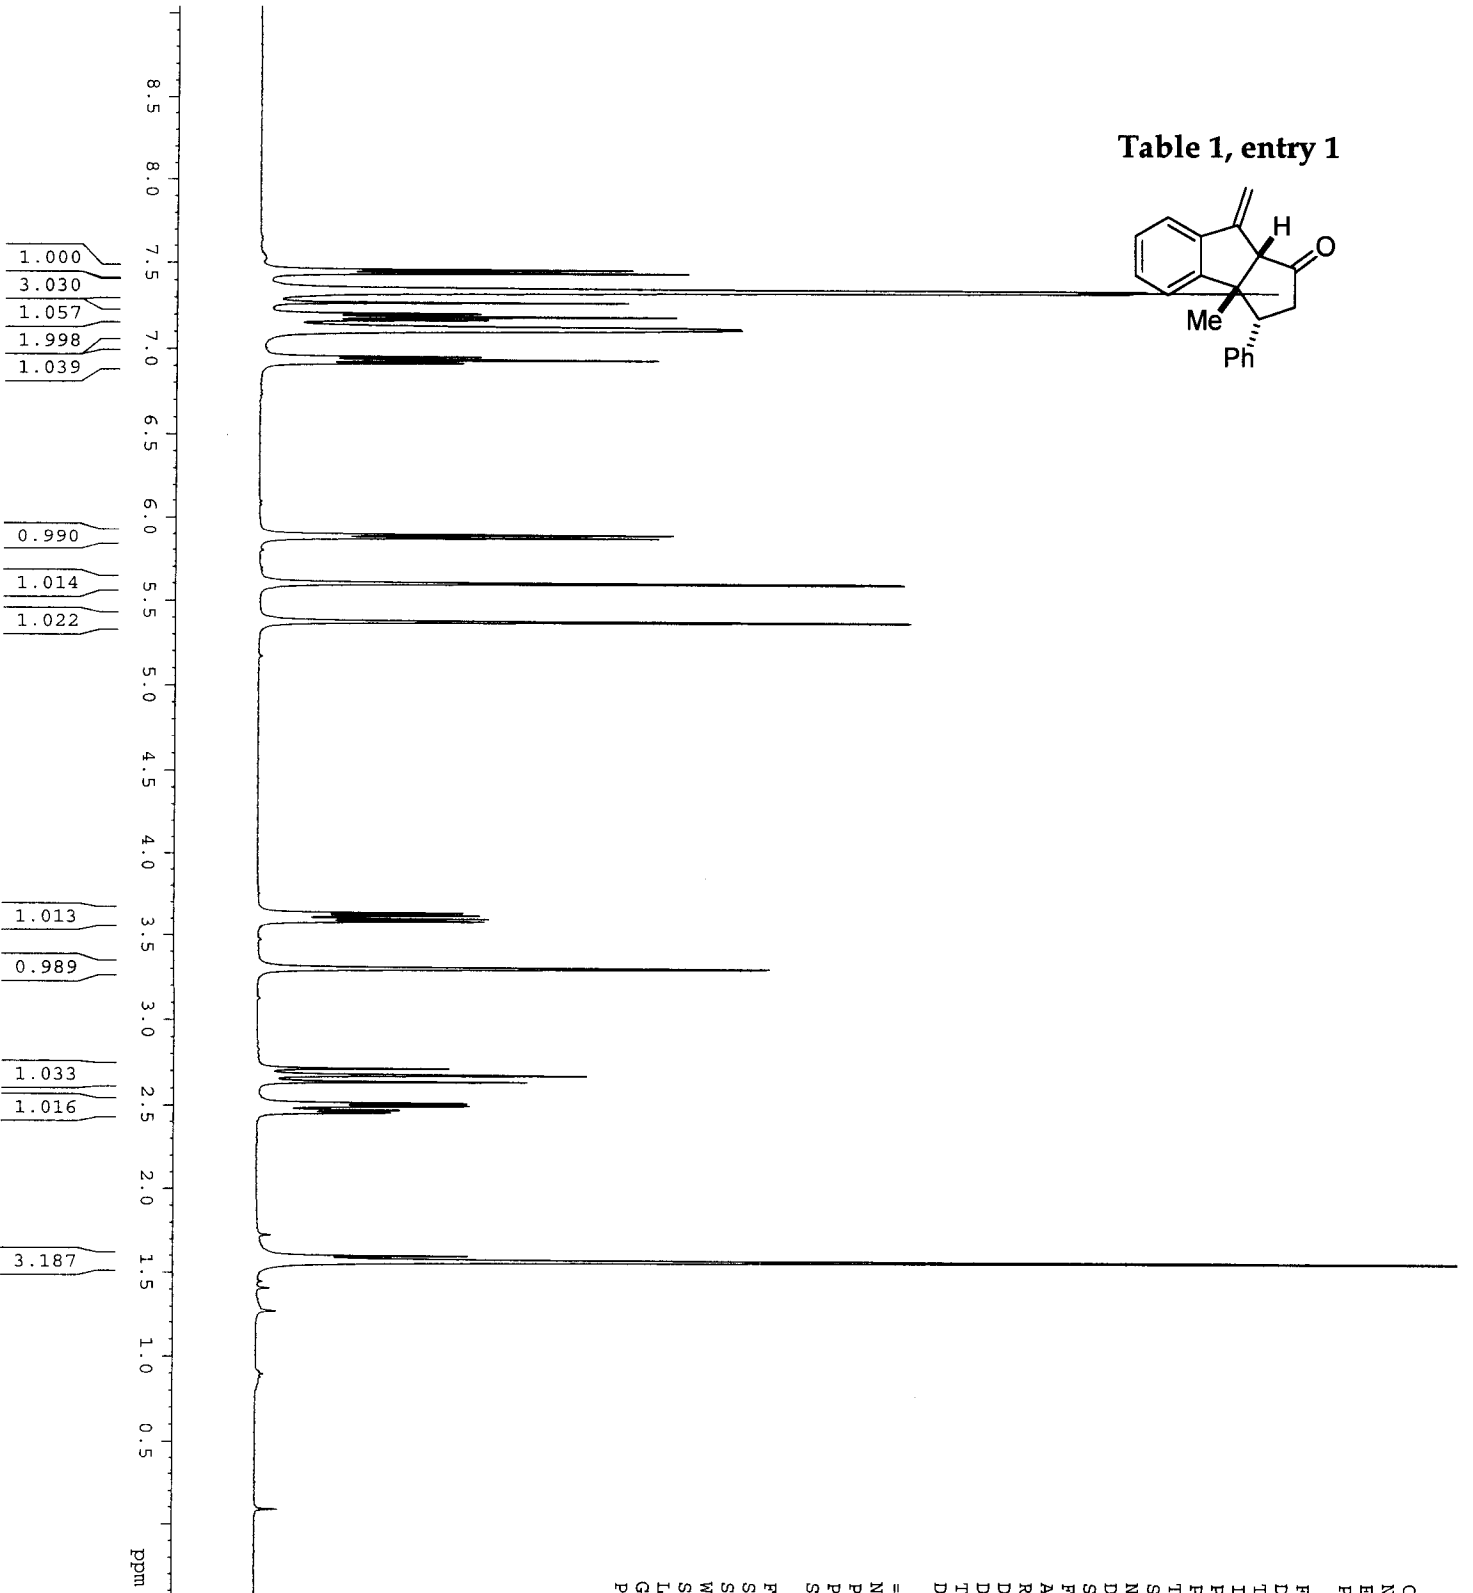

Current Data Parameters  
 NAME Eb2-186A-Prod  
 EXPNO 1  
 PROCNO 1

F2 - Acquisition Parameters

Date\_ 20051225  
 Time 19.11  
 INSTRUM spect  
 PROBHID 5mm BBO BB-1  
 PULPROG zg30  
 TD 65536  
 SOLVENT CDCl3  
 NS 9  
 DS 2  
 SWH 8278.146 Hz  
 FIDRES 0.126314 Hz  
 AQ 3.9584243 sec  
 RG 128  
 DW 60.400 usec  
 DE 6.00 usec  
 TE 300.0 K  
 D1 1.00000000 sec

==== CHANNEL f1 =====  
 NUCL1 1H  
 P1 7.90 usec  
 PL1 0.00 dB  
 SFO1 400.1324710 MHz

F2 - Processing parameters  
 SI 32768  
 SF 400.1300051 MHz  
 WDM EM  
 SSB 0  
 LB 0.30 Hz  
 GB 0  
 PC 1.00



Table 1, entry 2

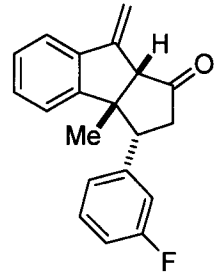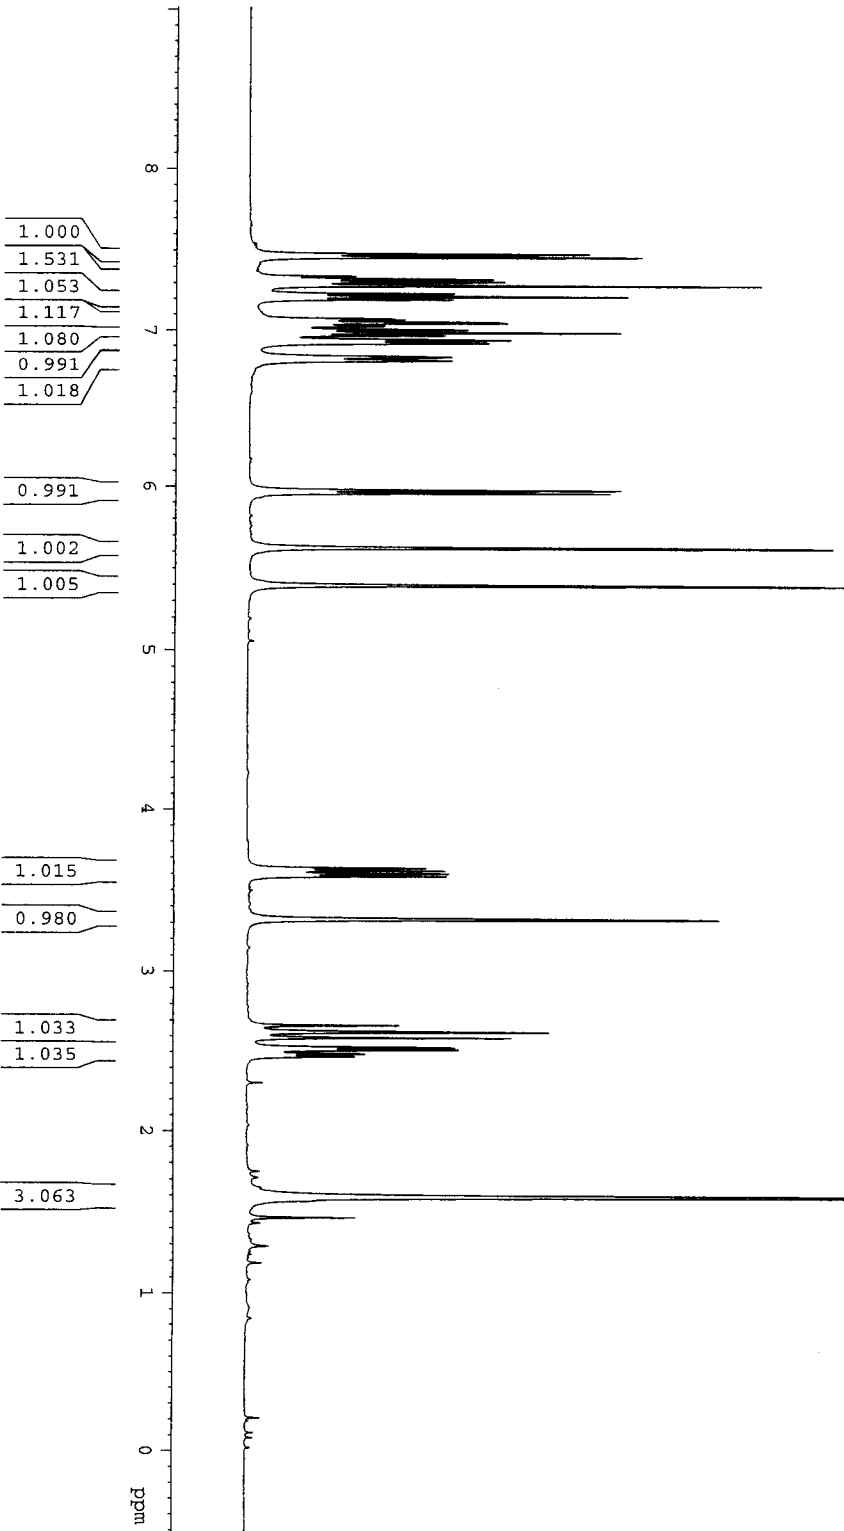

Current Data Parameters  
 NAME EB2-202A-23-35  
 EXPNO 1  
 PROCNO 1

F2 - Acquisition Parameters

Date\_ 20051221  
 Time\_ 18.49  
 INSTRUM spect  
 PROBHD 5mm BBO BB-1  
 PULPROG zg30  
 TD 65536  
 SOLVENT CDCl3  
 NS 6  
 DS 2  
 SWH 8278.146 Hz  
 FIDRES 0.126314 Hz  
 AQ 3.9584243 sec  
 RG 57  
 DW 60.400 usec  
 DE 6.00 usec  
 TE 300.0 K  
 D1 1.00000000 sec

==== CHANNEL f1 =====

NUC1 1H  
 P1 7.90 usec  
 Pl1 0.00 dB  
 SFO1 400.1324710 MHz

F2 - Processing parameters

SI 32768  
 SF 400.1300000 MHz  
 WDW EM  
 SSB 0  
 LB 0.30 Hz  
 GB 0  
 PC 1.00

Table 1, entry 3

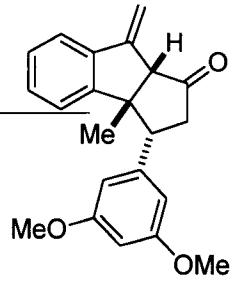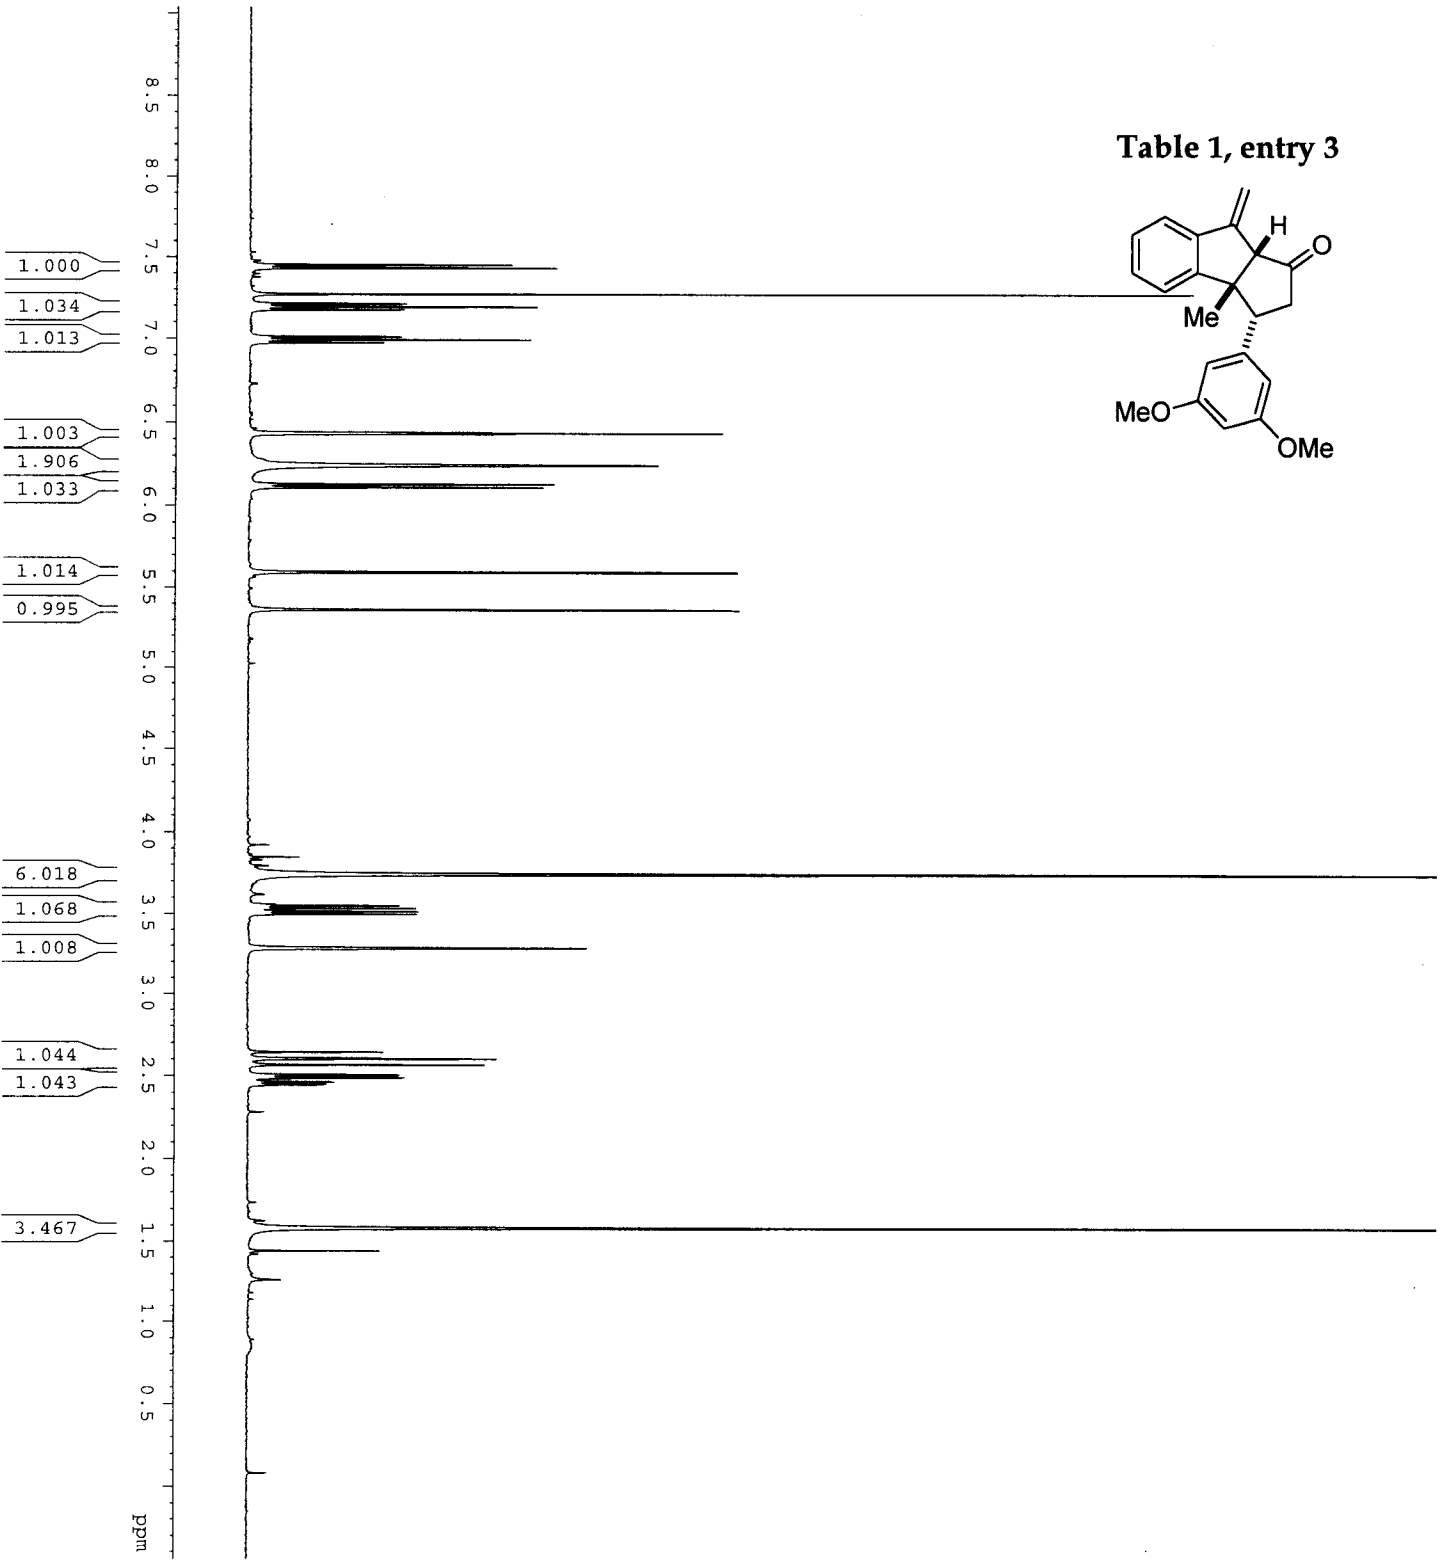

Current Data Parameters  
 NAME EB2-198B-40-46  
 EXPNO 3  
 PROCNO 1

F2 - Acquisition Parameters  
 Date\_ 20051225  
 Time 19.17

INSTRUM spect  
 PROBHD 5mm BBO BB-1  
 PULPROG zg30  
 TD 65536  
 SOLVENT CDCl3

DS 7  
 SMH 8278.146 Hz  
 FIDRES 0.126314 Hz  
 AQ 3.9584243 sec  
 RG 256  
 DW 60.400 usec  
 DE 6.00 usec  
 TE 300.0 K  
 D1 1.00000000 sec

===== CHANNEL f1 =====  
 NUC1 1H  
 P1 7.90 usec  
 PL1 0.00 dB  
 SFO1 400.1324710 MHz

F2 - Processing parameters  
 SI 32768  
 SF 400.1300051 MHz  
 WDW EM  
 SSB 0  
 LB 0.30 Hz  
 GB 0  
 PC 1.00

Table 1, entry 4

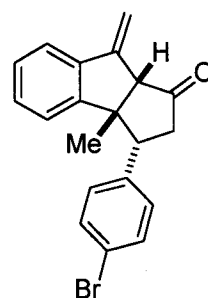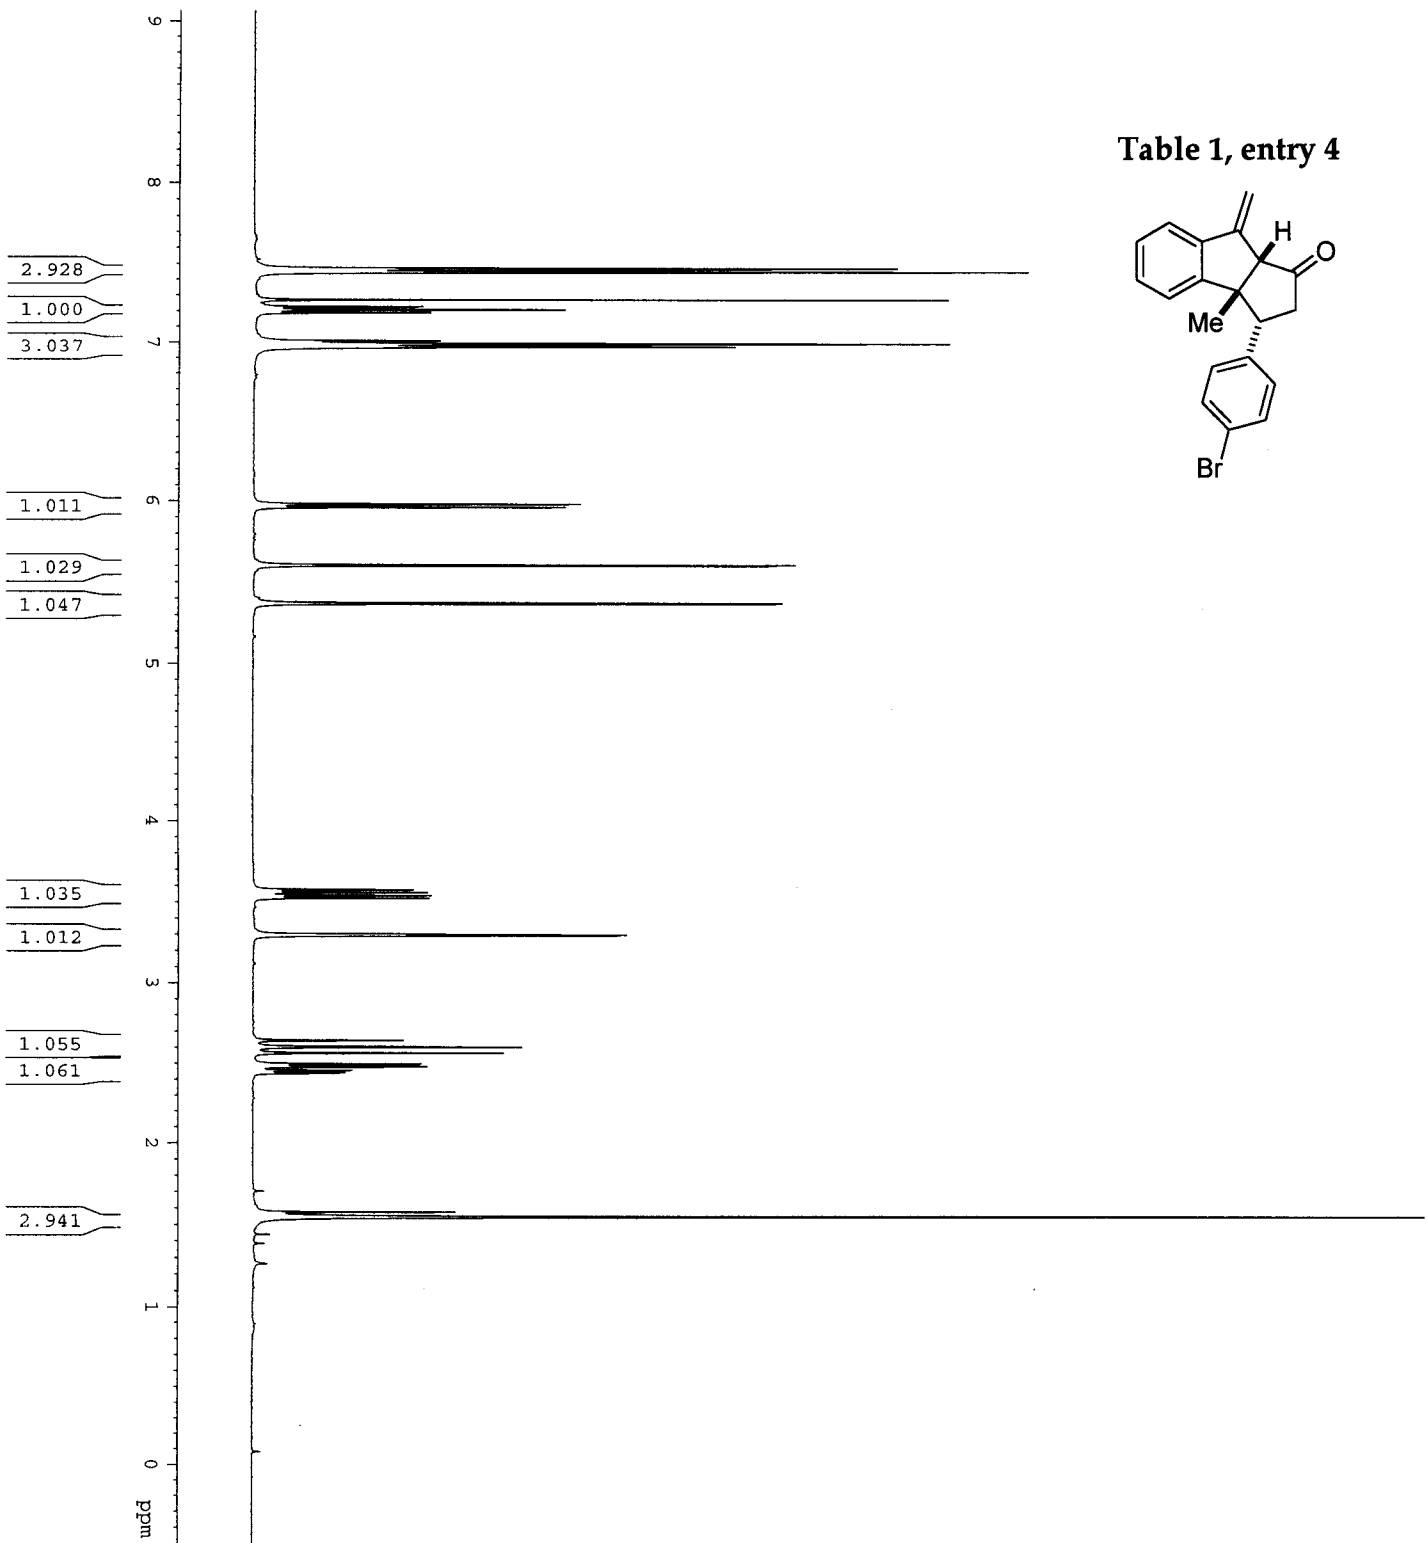

```

Current Data Parameters
NAME          EB2-178--28-44
EXPNO         1
PROCNO        1

F2 - Acquisition Parameters
Date_         20051223
Time          0.36
INSTRUM       spect
PROBHD        5mm BBO BB-1
PULPROG       zg30
TD            65536
SOLVENT       CDCl3
NS            11
DS            2
SWH           8278.146 Hz
FIDRES        0.126314 Hz
AQ            3.9584243 sec
RG            287.4
DW            60.400 usec
DE            6.00 usec
TE            300.0 K
D1            1.00000000 sec

===== CHANNEL f1 =====
NUC1          1H
P1            7.90 usec
PL1           0.00 dB
SFO1         400.1324710 MHz

F2 - Processing parameters
SI            32768
SF            400.1300054 MHz
WDW           EM
SSB           0
LB            0.30 Hz
GB            0
PC            1.00
    
```

Table 1, entry 5

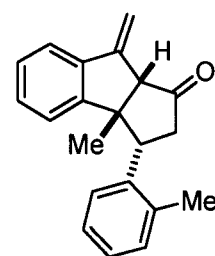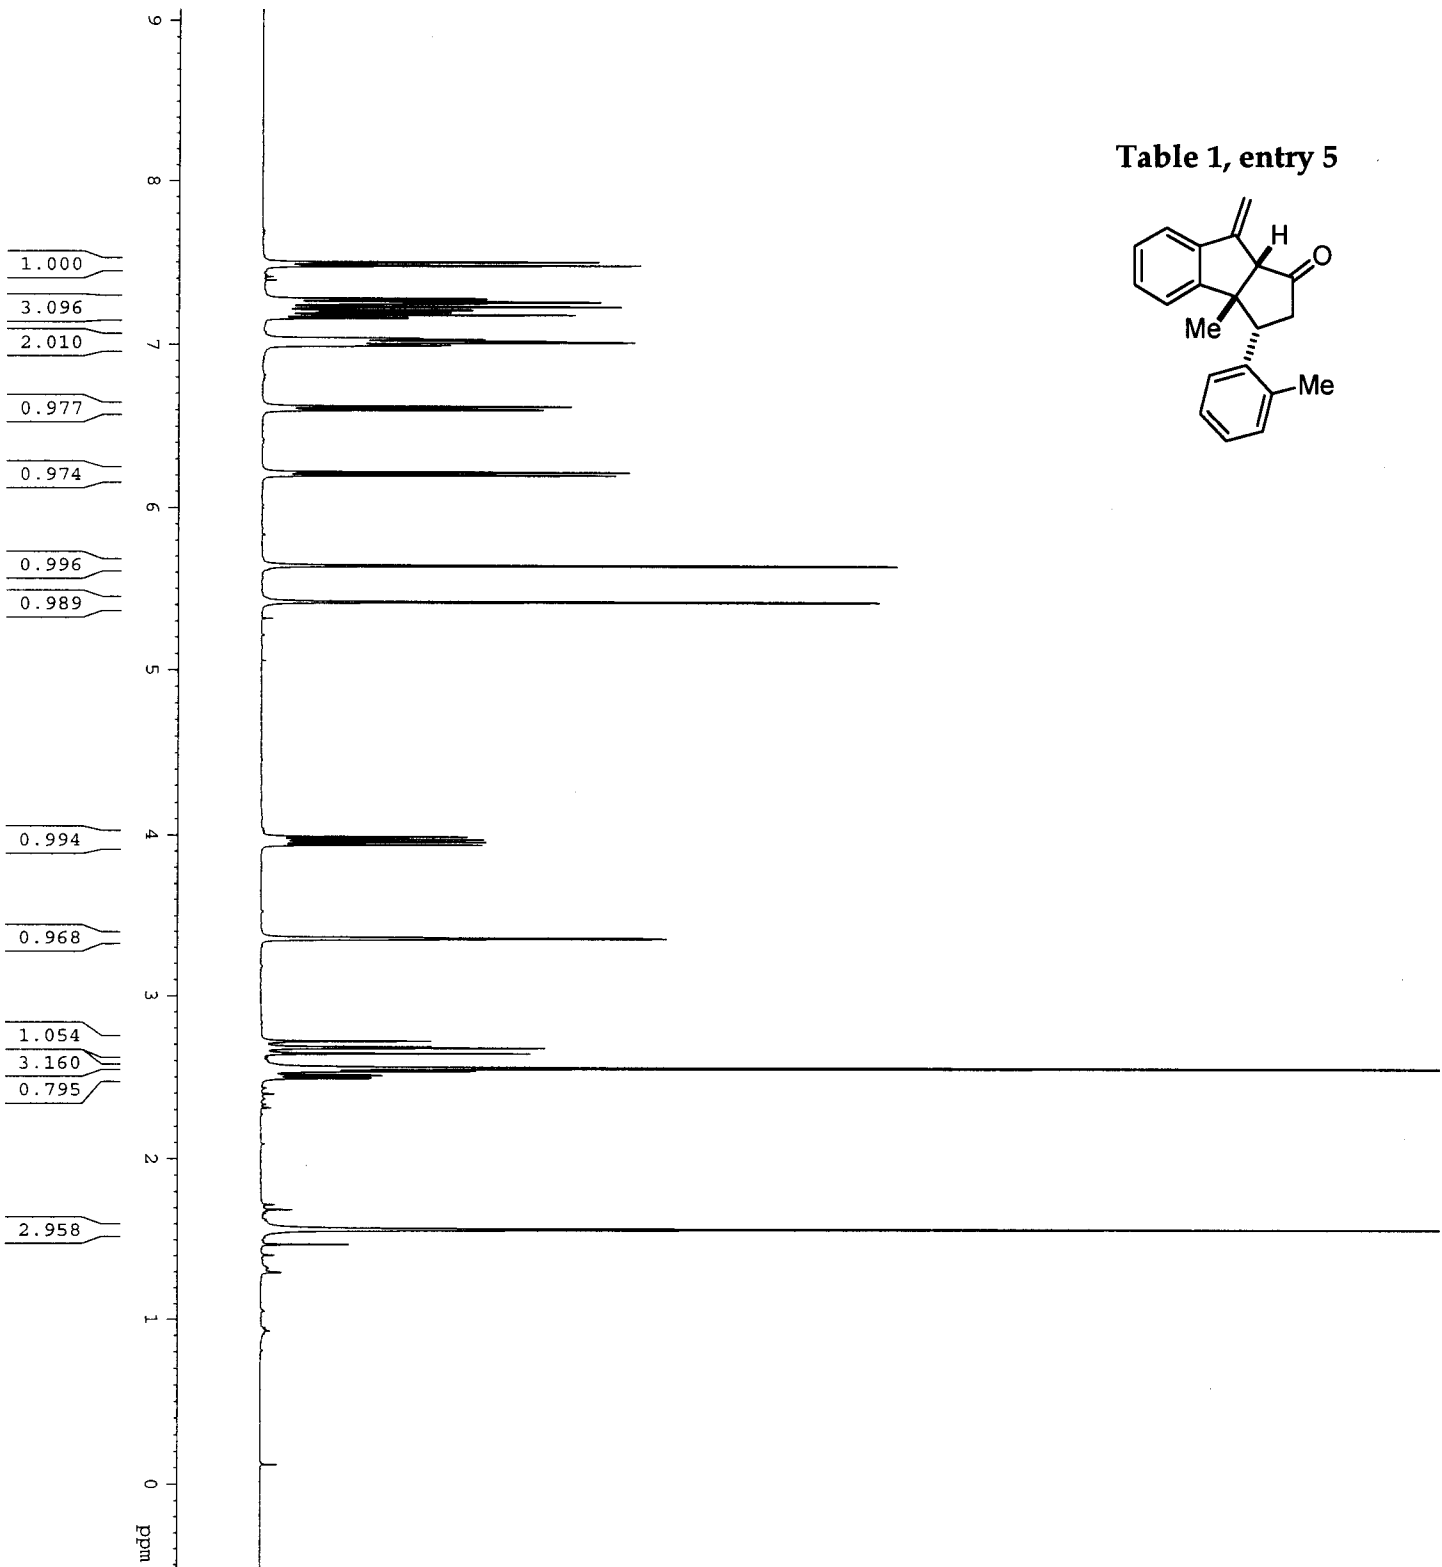

```

Current Data Parameters
NAME      EB2-196A-20-28
EXPNO    11
PROCNO   1

F2 - Acquisition Parameters
Date_    20051220
Time     21.29
INSTRUM  spect
PROBHD   5mm BBO BB-1
PULPROG  zg30
TD       65536
SOLVENT  CDCl3
NS       6
DS       2
SWH      8278.146 Hz
FIDRES   0.126314 Hz
AQ       3.9584243 sec
RG       57
DW       60.400 usec
DE       6.00 usec
TE       300.0 K
D1       1.00000000 sec

===== CHANNEL f1 =====
NUC1      1H
P1       7.90 usec
PL1      0.00 dB
SFO1     400.1324710 MHz

F2 - Processing Parameters
SI       32768
SF       400.1300000 MHz
WDW      EM
SSB      0
LB       0.30 Hz
GB       0
PC       1.00
    
```

Table 1, entry 6

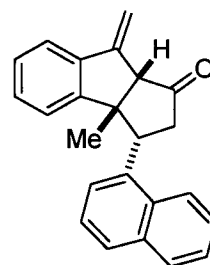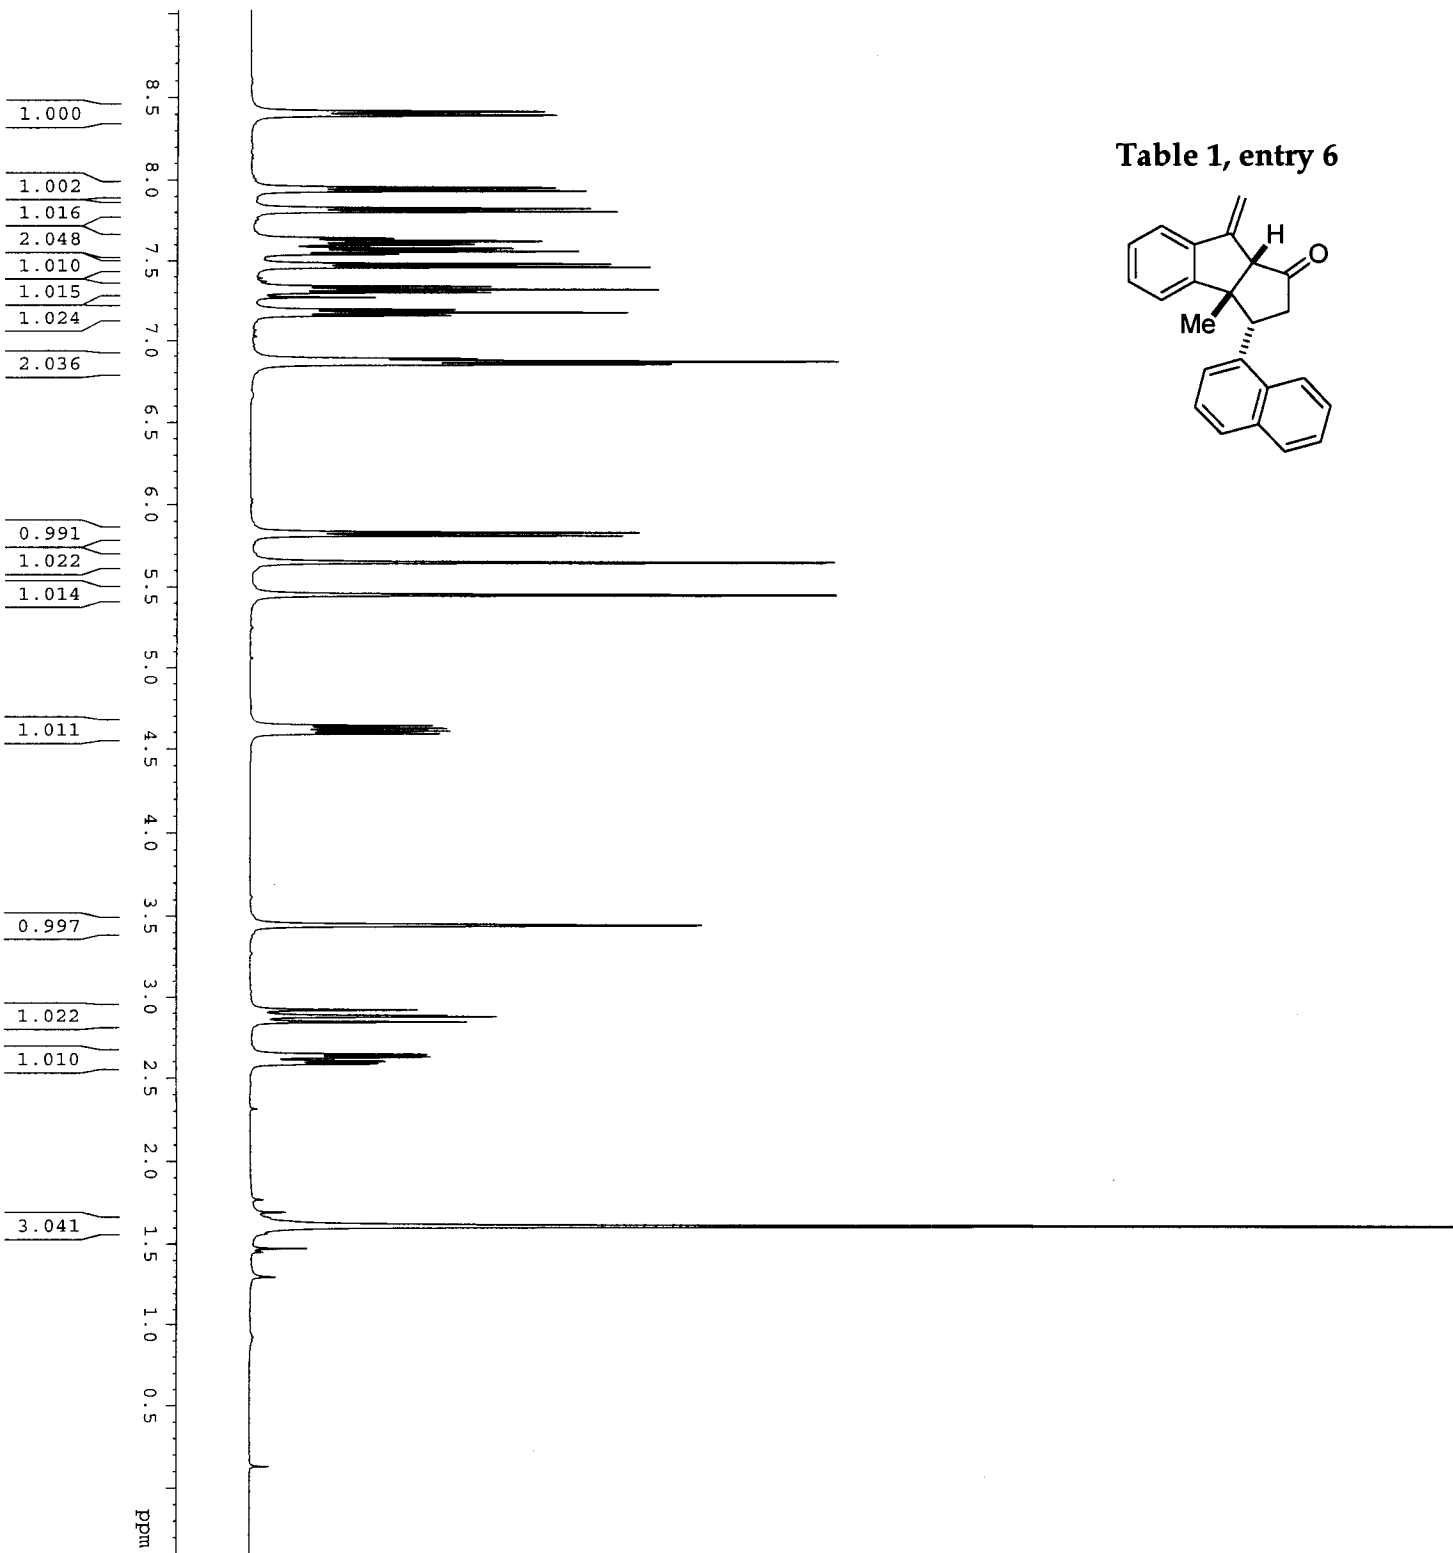

Current Data Parameters  
 NAME EB2-182A-24-38  
 EXPNO 1  
 PROCNO 1

F2 - Acquisition Parameters

Date\_ 20051214  
 Time\_ 18.12  
 INSTRUM spect  
 PROBD 5mm BBO BB-1  
 PULPROG zg30  
 TD 65536  
 SOLVENT CDCl3  
 NS 8  
 DS 2  
 SWH 8278.146 Hz  
 FIDRES 0.126314 Hz  
 AQ 3.9584243 sec  
 RG 64  
 DW 60.400 usec  
 DE 6.00 usec  
 TE 300.0 K  
 D1 1.00000000 sec

==== CHANNEL f1 =====

NUC1 1H  
 P1 7.90 usec  
 PL1 0.00 dB  
 SFO1 400.1324710 MHz

F2 - Processing parameters

SI 32768  
 SF 400.1300049 MHz  
 WDW EM  
 SSB 0  
 LB 0.30 Hz  
 GB 0  
 PC 1.00

Table 1, entry 7

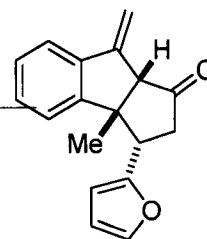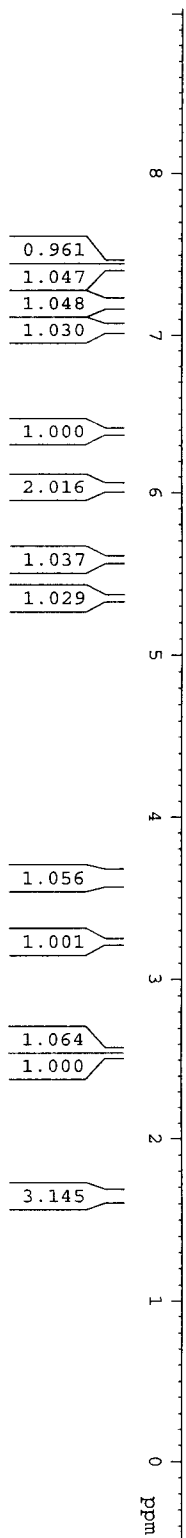

```

Current Data Parameters
NAME          ed2-204-19-31
EXPNO         1
PROCNO        1

F2 - Acquisition Parameters
Date_         20051223
Time_         1.08
INSTRUM       spect
PROBHD        5mm BBO BB-1
PULPROG       zg30
TD            65536
SOLVENT       CDCl3
NS            11
DS            2
SWH           8278.146 Hz
FIDRES        0.126314 Hz
AQ            3.9584243 sec
RG            362
DW            60.400 usec
DE            6.00 usec
TE            300.0 K
D1            1.00000000 sec

===== CHANNEL f1 =====
NUC1          1H
P1            7.90 usec
PL1           0.00 dB
SF01          400.1324710 MHz

F2 - Processing parameters
SI            32768
SF            400.1300056 MHz
WDW           EM
SSB           0
LB            0.30 Hz
GB            0
PC            1.00
  
```

Table 1, entry 8

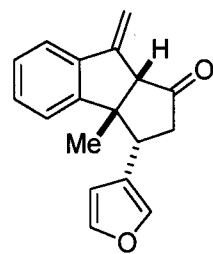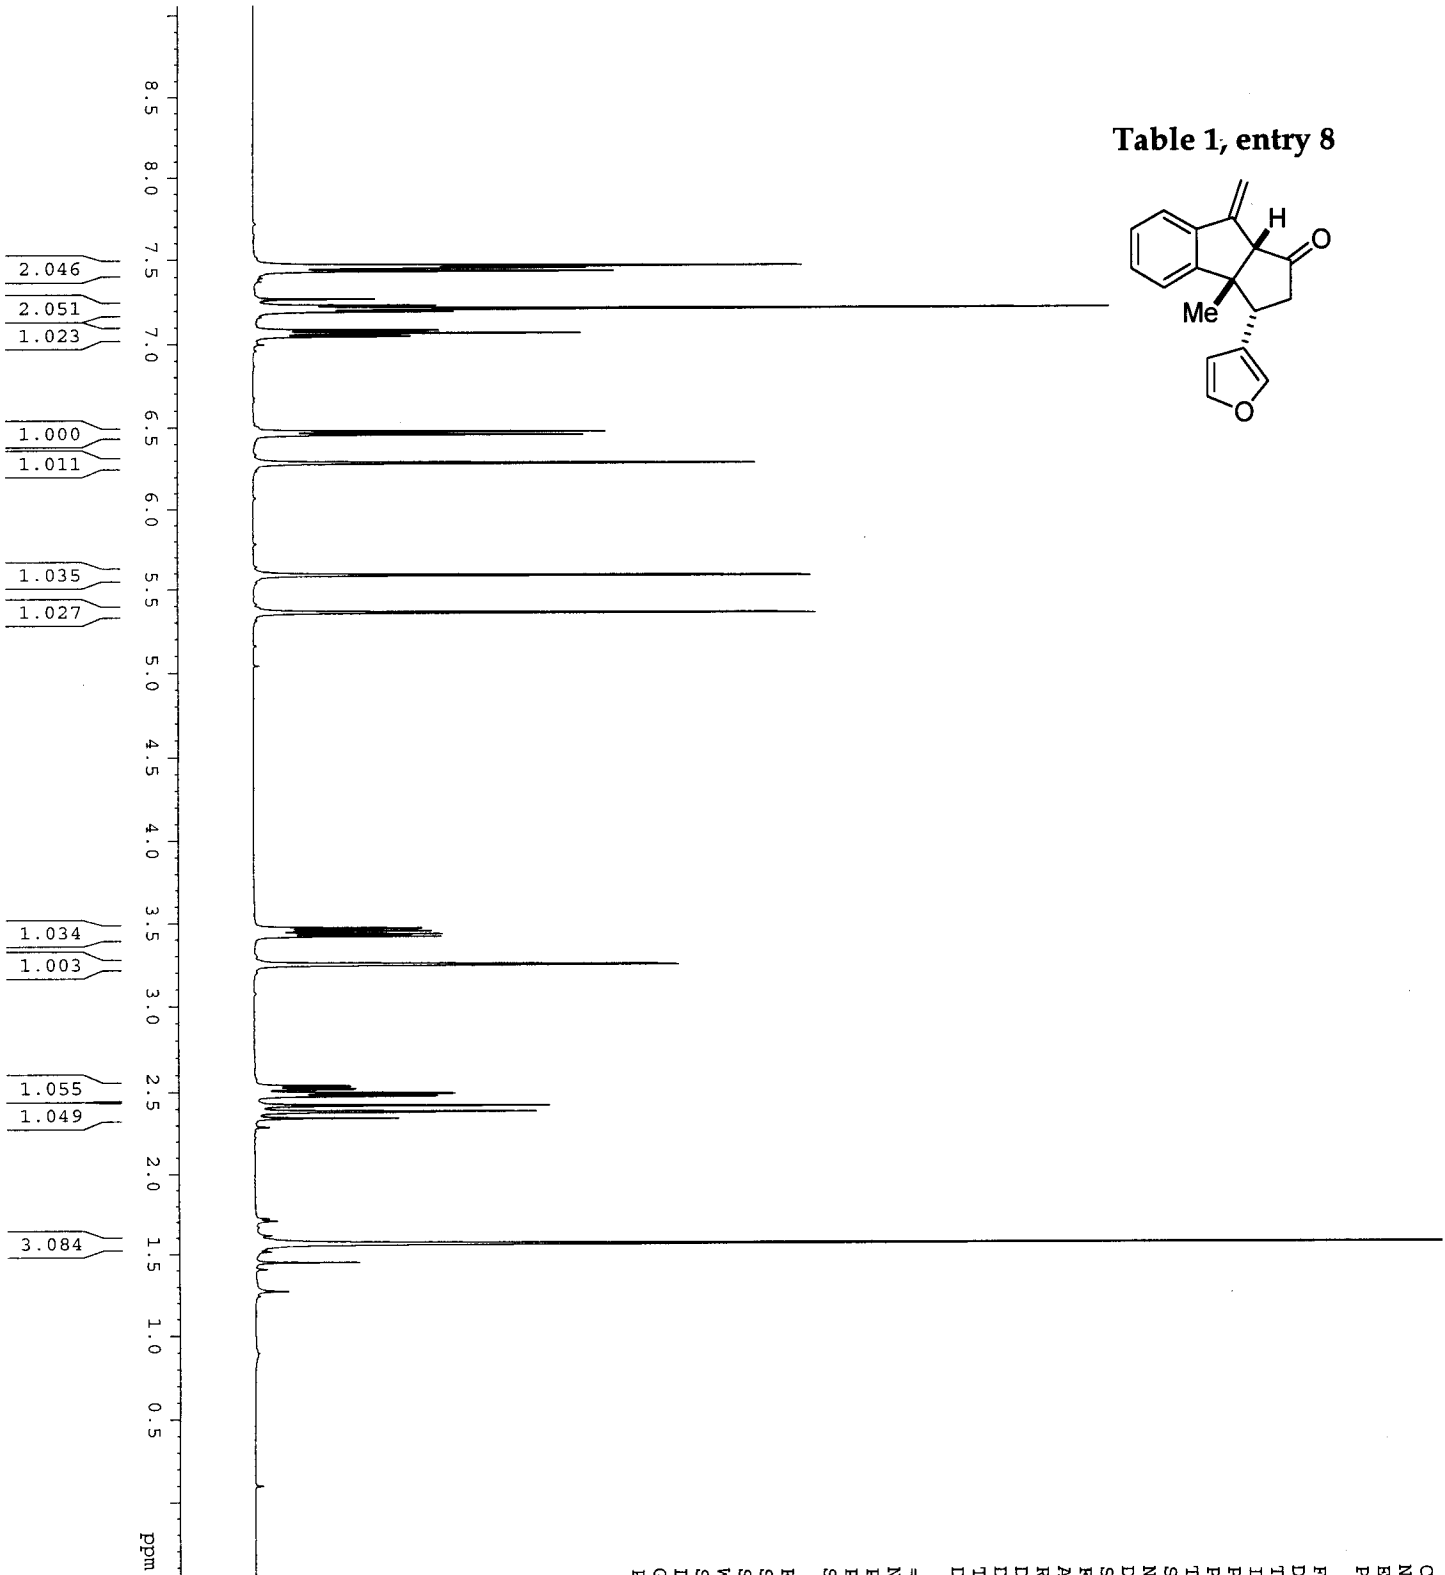

Current Data Parameters  
 NAME EB2-176Bfr37-4  
 EXPNO 1  
 PROCNO 1

F2 - Acquisition Parameters  
 Date\_ 20051211  
 Time 16.17

INSTRUM spect  
 PROBHD 5mm BBO BB-1  
 PULPROG zg30  
 TD 65536  
 SOLVENT CDCl3  
 NS 4  
 DS 2

SWH 8278.146 Hz  
 FIDRES 0.126314 Hz  
 AQ 3.9584243 sec  
 RG 57  
 DW 60.400 usec  
 DE 6.00 usec  
 TE 300.0 K  
 D1 1.00000000 sec

==== CHANNEL f1 =====  
 NUCl 1H  
 P1 7.90 usec  
 PL1 0.00 dB  
 SFO1 400.1324710 MHz

F2 - Processing parameters  
 SI 32768  
 SF 400.1300051 MHz  
 WDW EM  
 SSB 0  
 LB 0.30 Hz  
 GB 0  
 PC 1.00

Eq 8

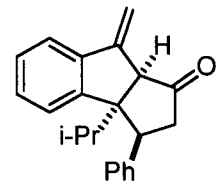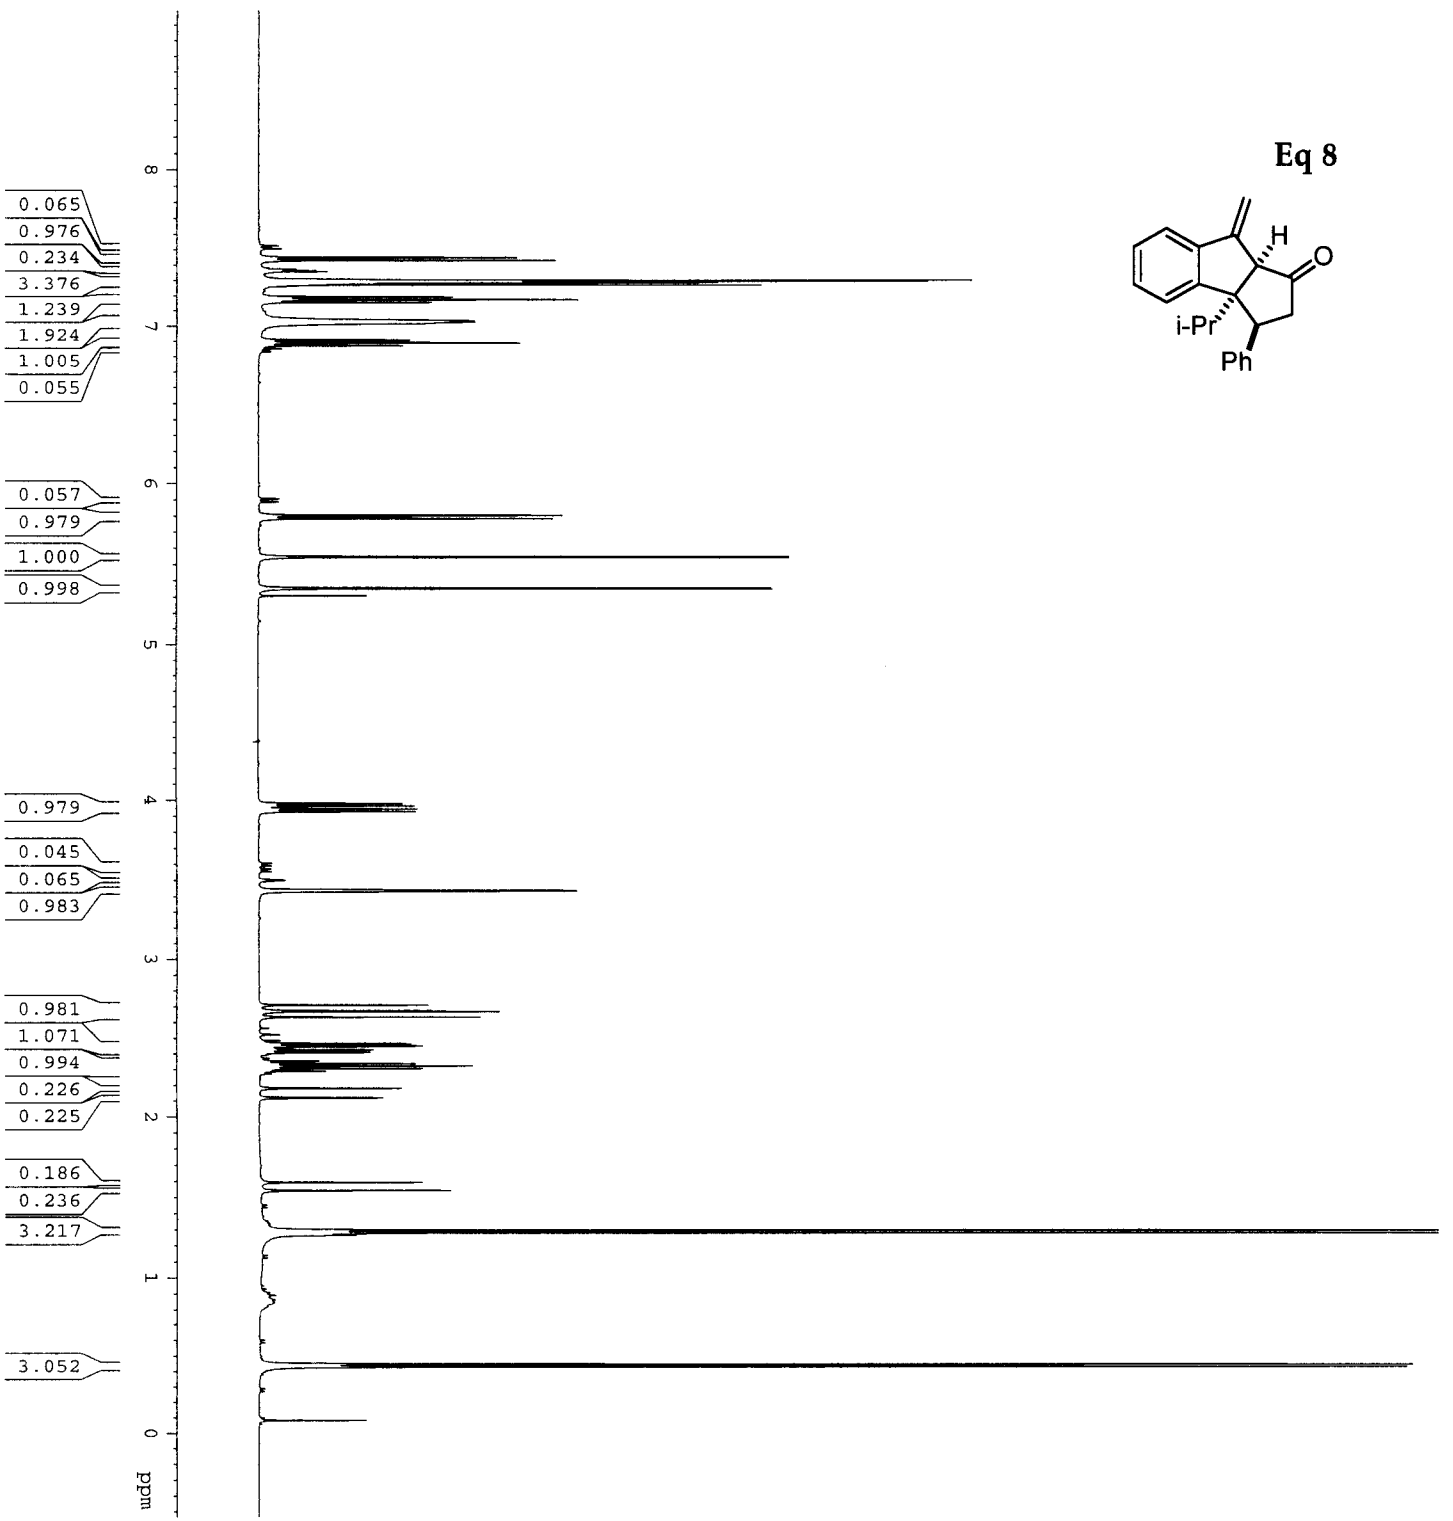

Current Data Parameters  
 NAME EB2-210A2c01  
 EXPNO 1  
 PROCNO 1

F2 - Acquisition Parameters  
 Date\_ 20051228  
 Time 18.25  
 INSTRUM spect  
 PROBD 5 mm QNP 1H/1  
 PULPROG zg30  
 TD 65536  
 SOLVENT CDCl3  
 NS 11  
 DS 2  
 SWH 8278.146 Hz  
 FIDRES 0.126314 Hz  
 AQ 3.9584243 sec  
 RG 322.5  
 DW 60.400 usec  
 DE 6.00 usec  
 TE 294.8 K  
 D1 1.00000000 sec  
 MCREST 0.00000000 sec  
 MCWRRK 0.01500000 sec

==== CHANNEL f1 =====  
 NUC1 1H  
 P1 9.88 usec  
 PL1 3.00 dB  
 SFO1 400.1324710 MHz

F2 - Processing parameters  
 SI 32768  
 SF 400.1300059 MHz  
 WDW EM  
 SSB 0  
 LB 0.30 Hz  
 GB 0  
 PC 1.00



# N-Cinnamoylated Catalyst

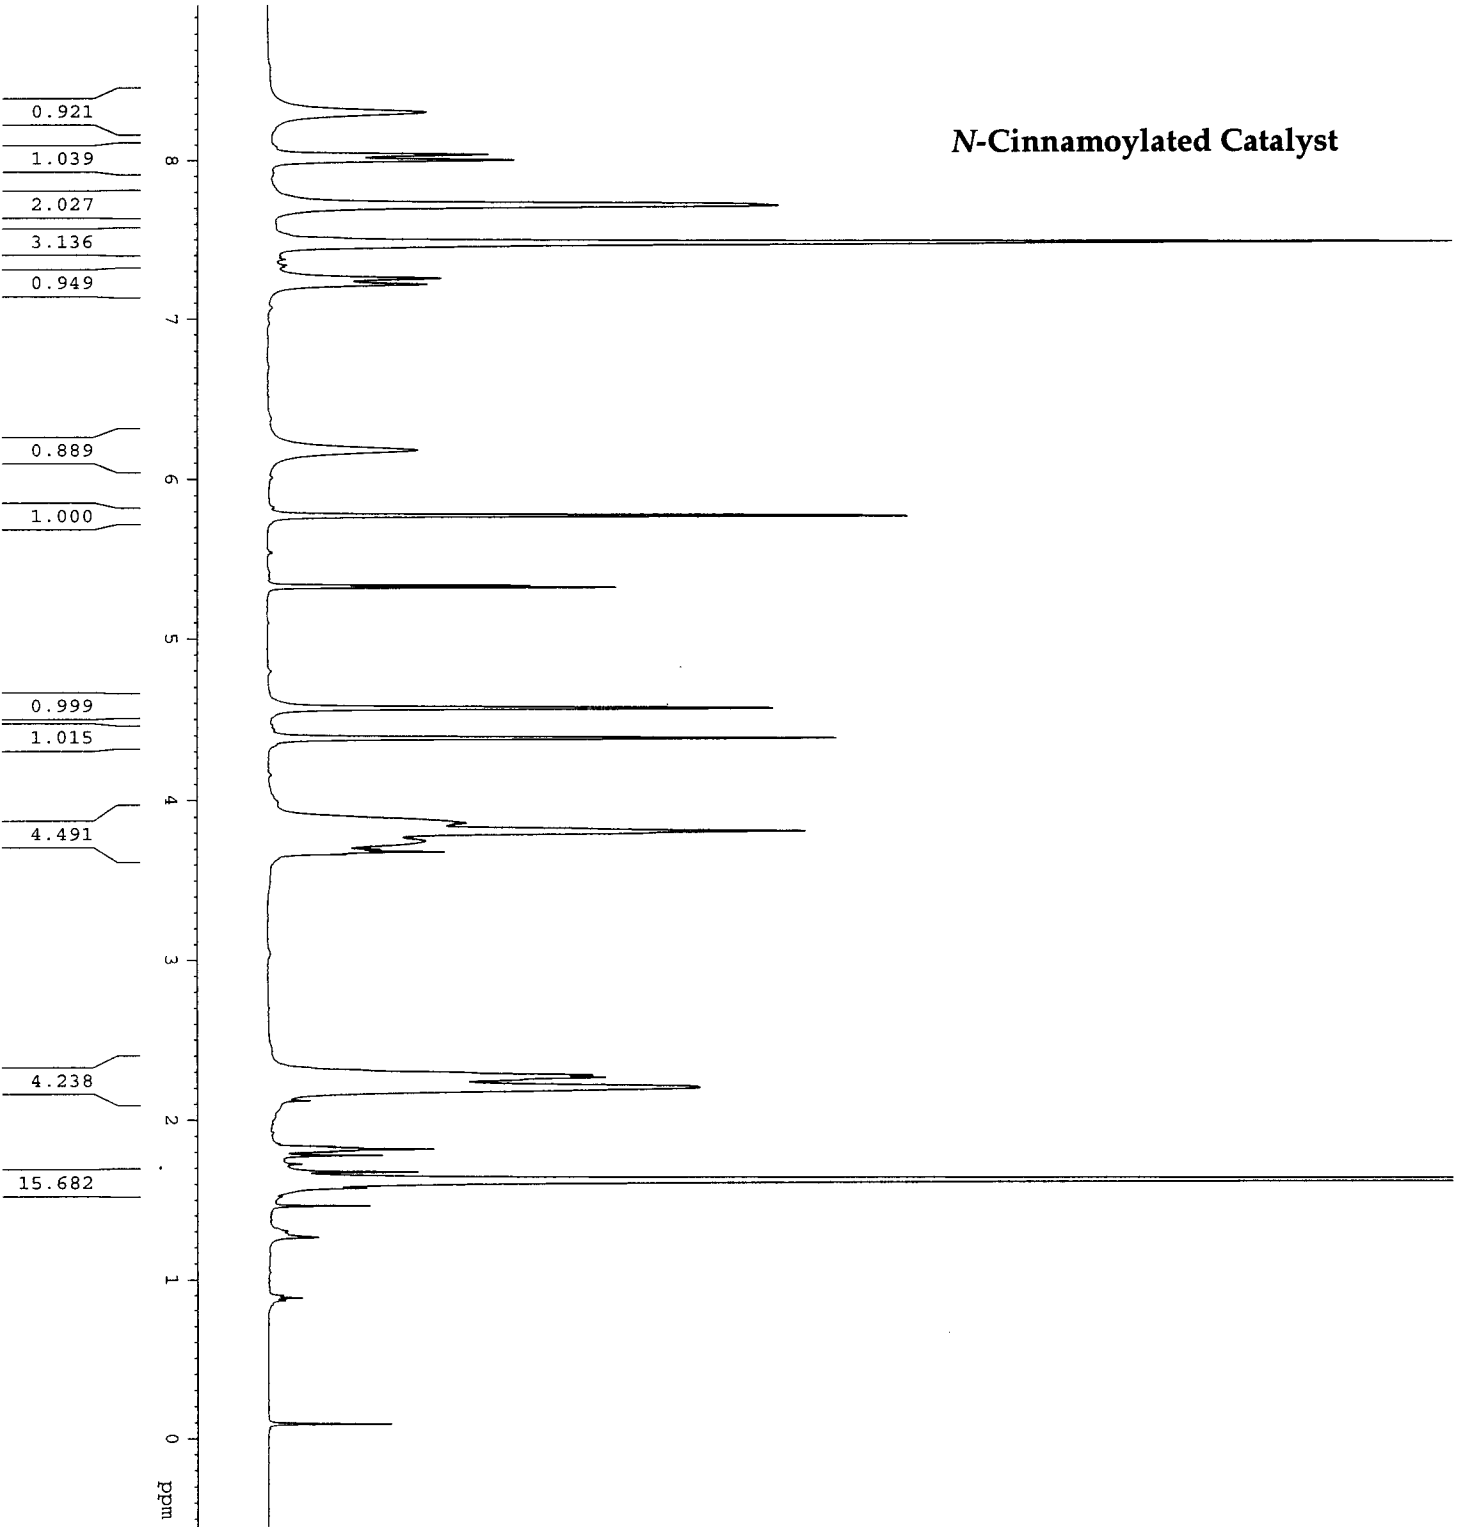

Current Data Parameters  
 NAME eb2-190  
 EXPNO 1  
 PROCNO 1

F2 - Acquisition Parameters  
 Date\_ 20051217  
 Time 18.16

INSTRUM spect  
 PROBHD 5 mm QNP 1H/1  
 PULPROG zg30  
 TD 65536  
 SOLVENT CD2Cl2  
 NS 32  
 DS 2

SWH 8278.146 Hz  
 FIDRES 0.126314 Hz  
 AQ 3.9584243 sec  
 RG 101.6  
 DW 60.400 usec  
 DE 6.00 usec  
 TE 293.7 K  
 D1 1.00000000 sec  
 MCREST 0.00000000 sec  
 MCWRR 0.01500000 sec

==== CHANNEL f1 =====  
 NUC1 1H  
 P1 9.88 usec  
 PL1 3.00 dB  
 SFO1 400.1324710 MHz

F2 - Processing parameters  
 SI 32768  
 SF 400.1300146 MHz  
 WDW EM  
 SSB 0  
 LB 0.30 Hz  
 GB 0  
 PC 1.00
